# Supplementary material for: Highly enantioselective alkynylation of aldehydes catalyzed by a new oxazolidine–titanium complex
Source: Royal Society of Chemistry journal article supplement (doi:10.1039/b719624e), 2008-01-01
Supplement: b719624e.pdf [file b719624e.pdf]

## Supporting Information

### **Highly Enantioselective Asymmetric Alkynylation of Aldehydes Catalyzed by a New Oxazolidine-Titanium Complex**

Zhou Xu, Jincheng Mao\* and Yawen Zhang\*

*Key Laboratory of Organic Synthesis of Jiangsu Province, College of Chemistry and Chemical  
Engineering, Suzhou (Soochow) University, Suzhou 215123, China*

\* Corresponding author. Tel: +86 512 65880403; fax: +86 512 65880089; E-mail address:  
jcmiao@suda.edu.cn (J. Mao)

# Copy of HRMS, <sup>1</sup>H, <sup>13</sup>C NMR and IR Spectra for Ligands

Figure-1 : HRMS spectrum of ligand **2a**

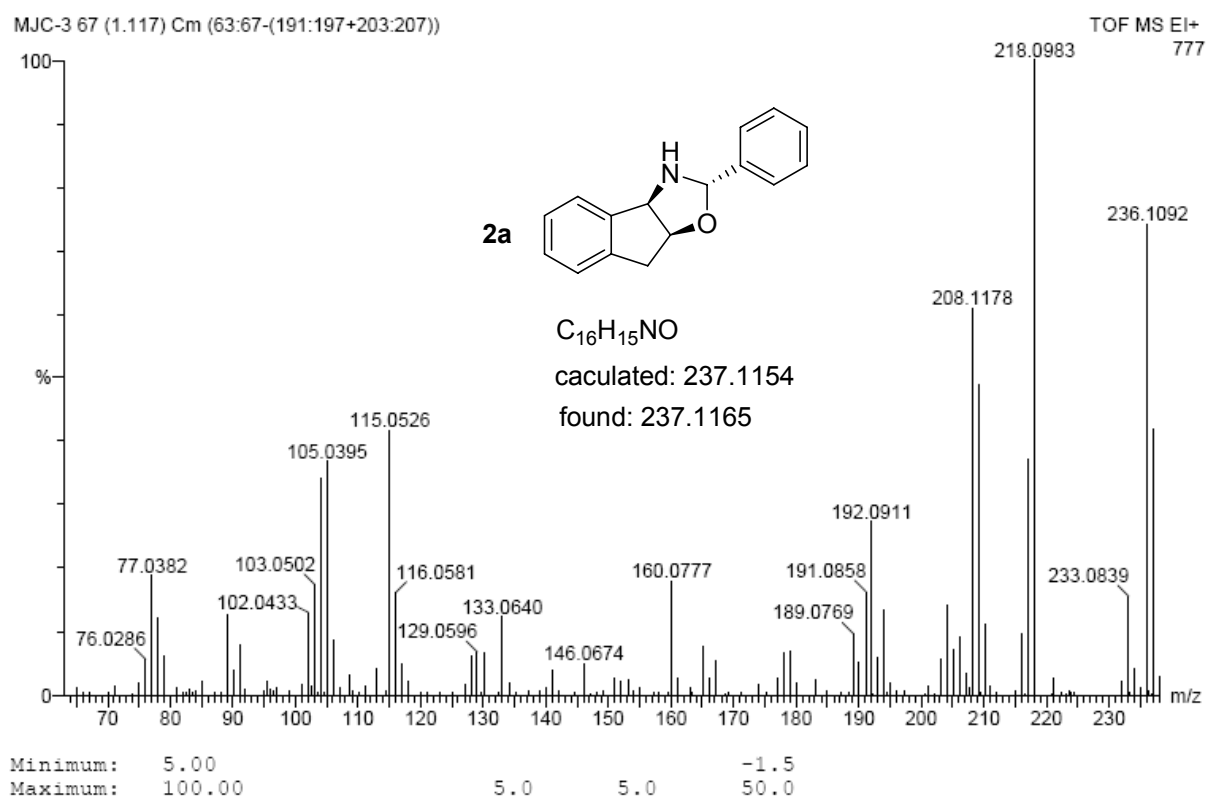

Figure-2 : HRMS spectrum of ligand **2b**

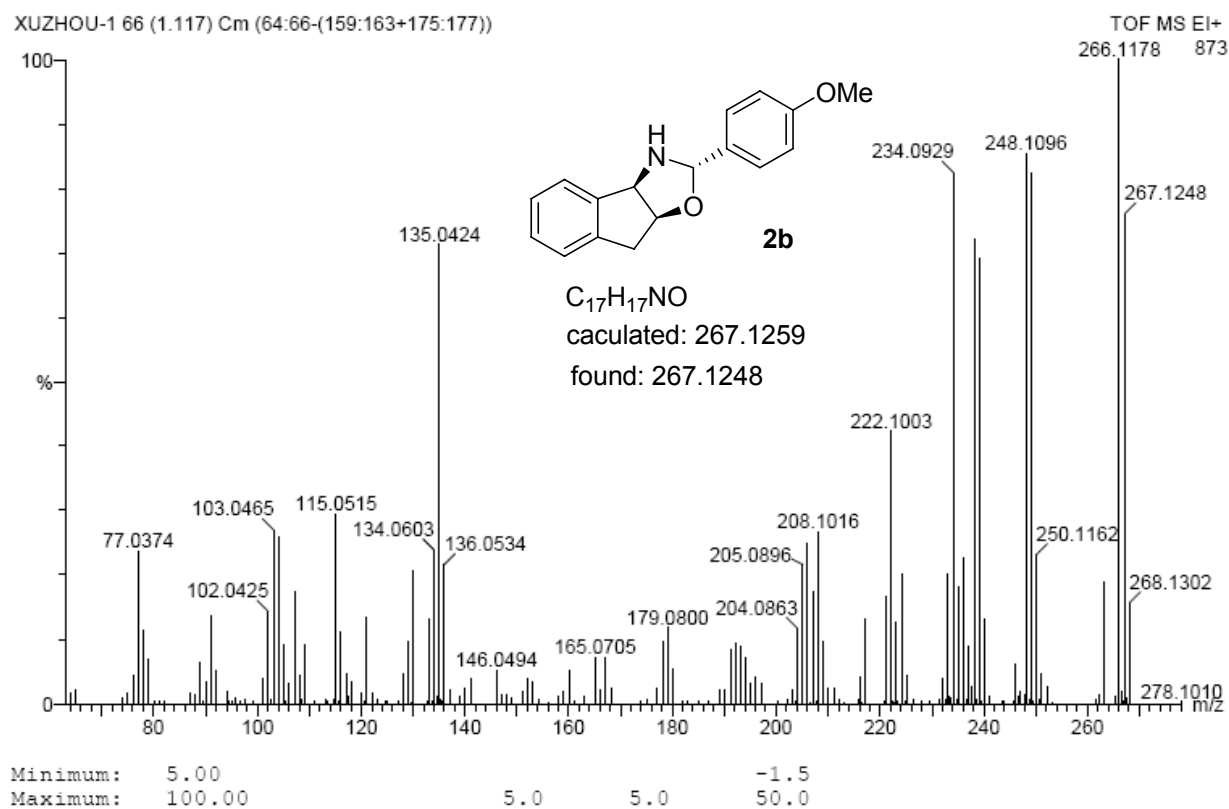

Figure-3 : HRMS spectrum of ligand **2c**

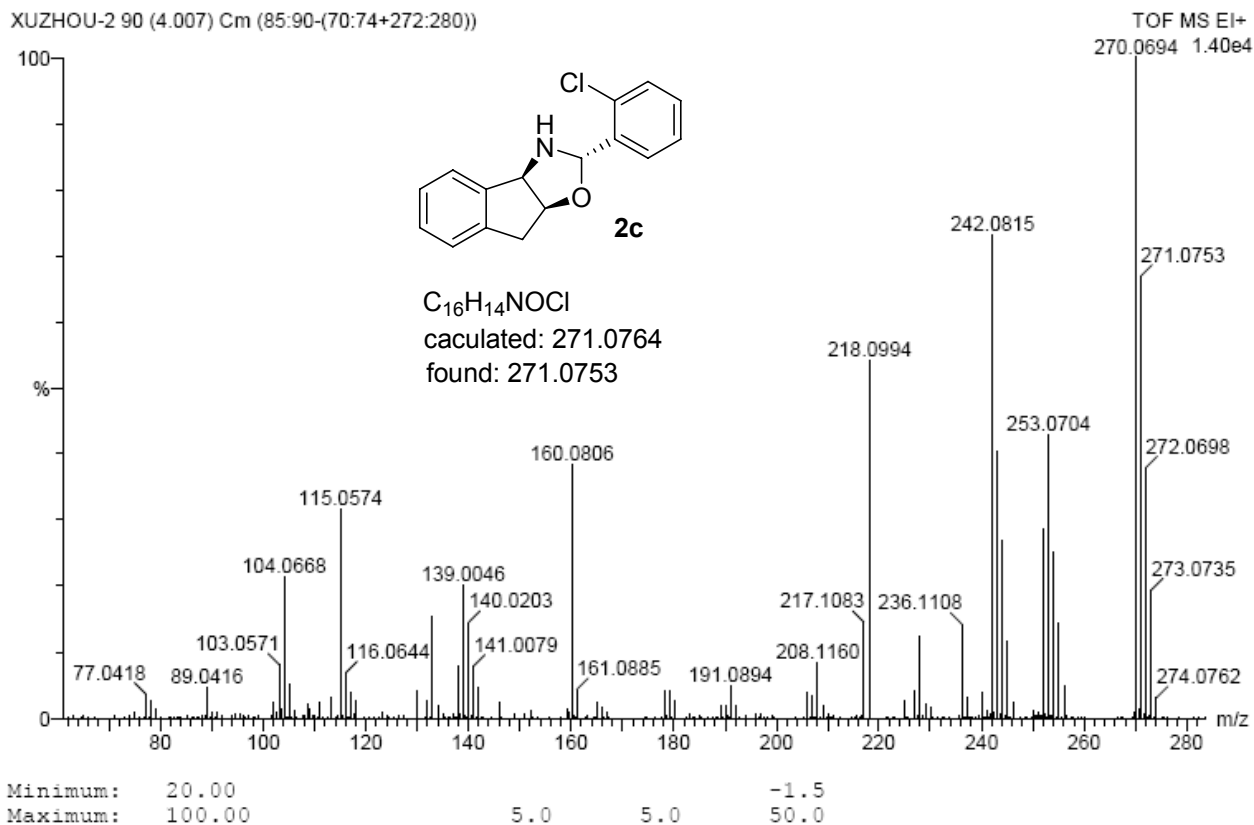

Figure-4 : HRMS spectrum of ligand **2d**

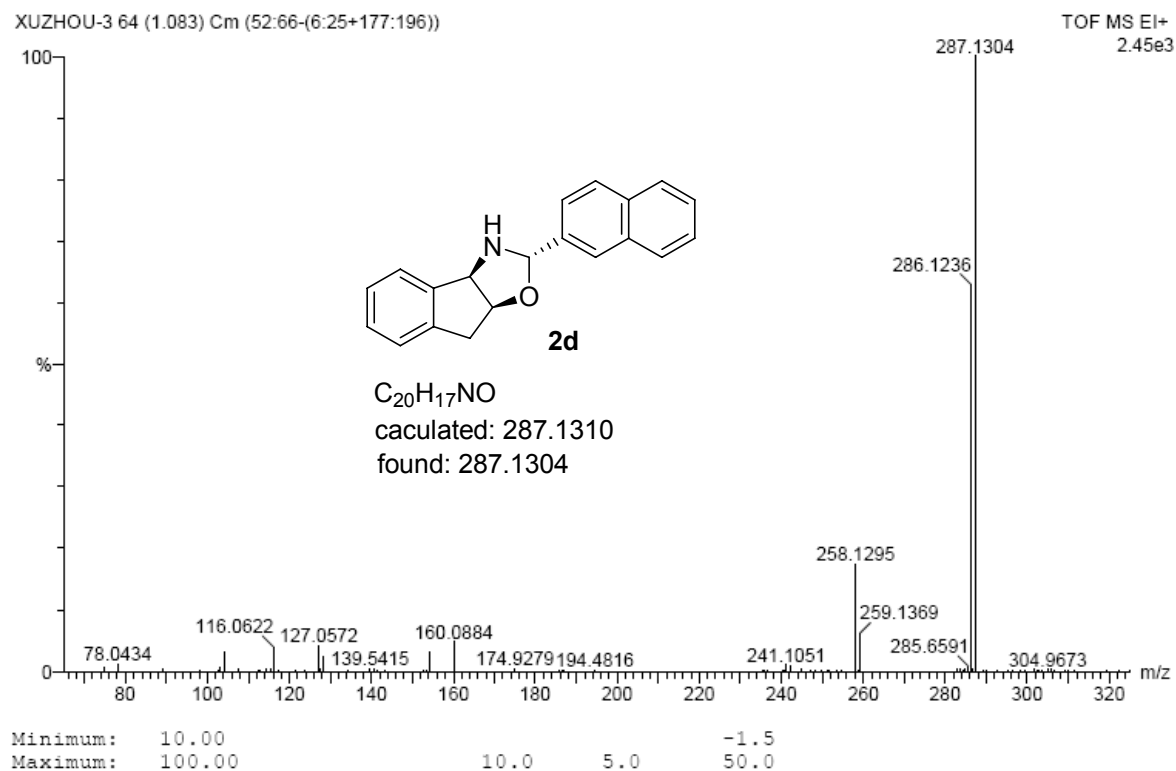



Figure-7 :  $^1\text{H}$  NMR spectra of ligand **2c**

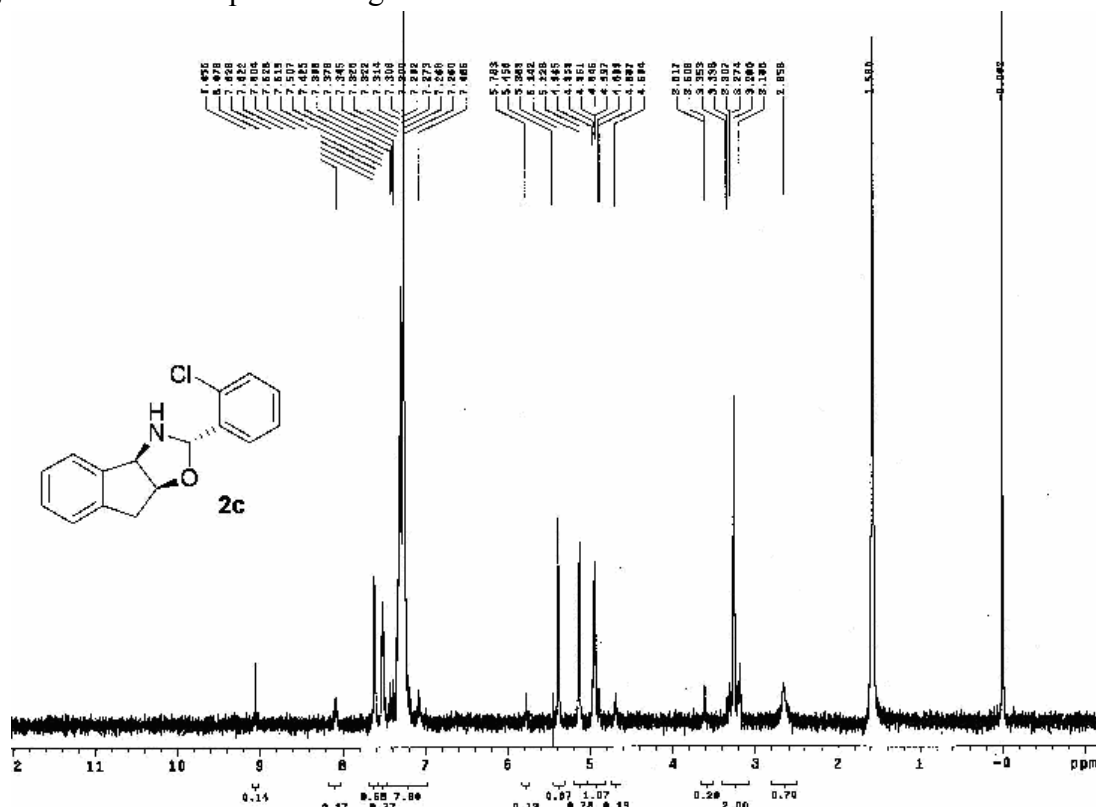

Figure-8 :  $^1\text{H}$  NMR spectra of ligand **2d**

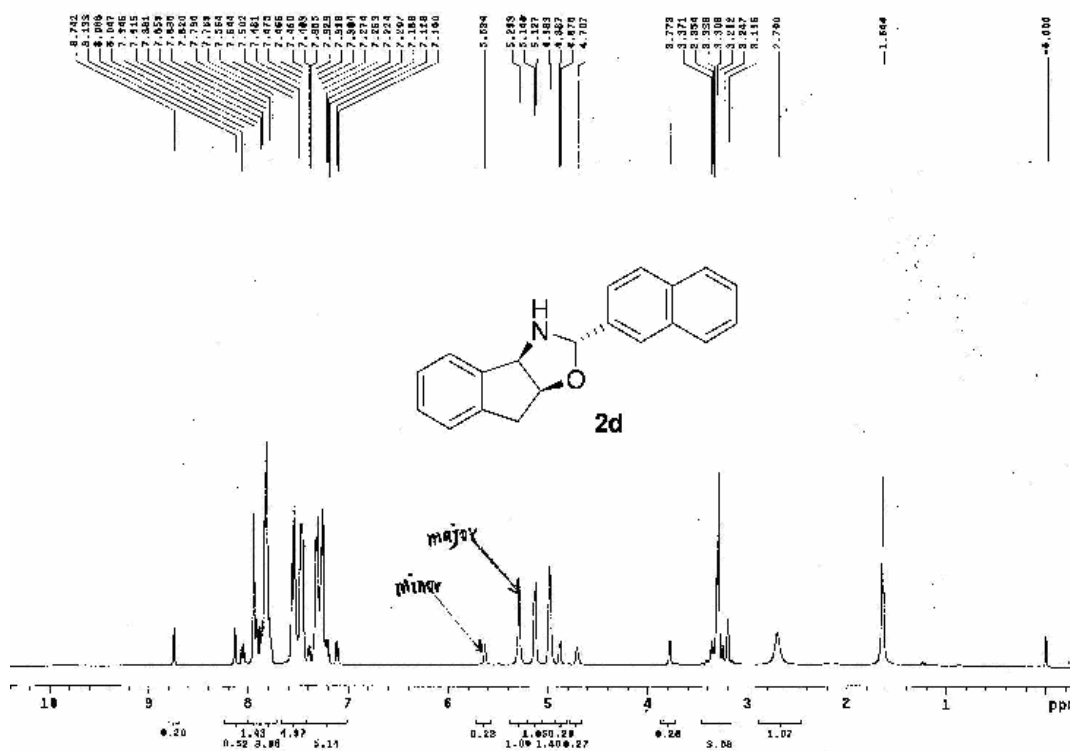

Figure-9 :  $^{13}\text{C}$  NMR NMR spectra of ligand 2a

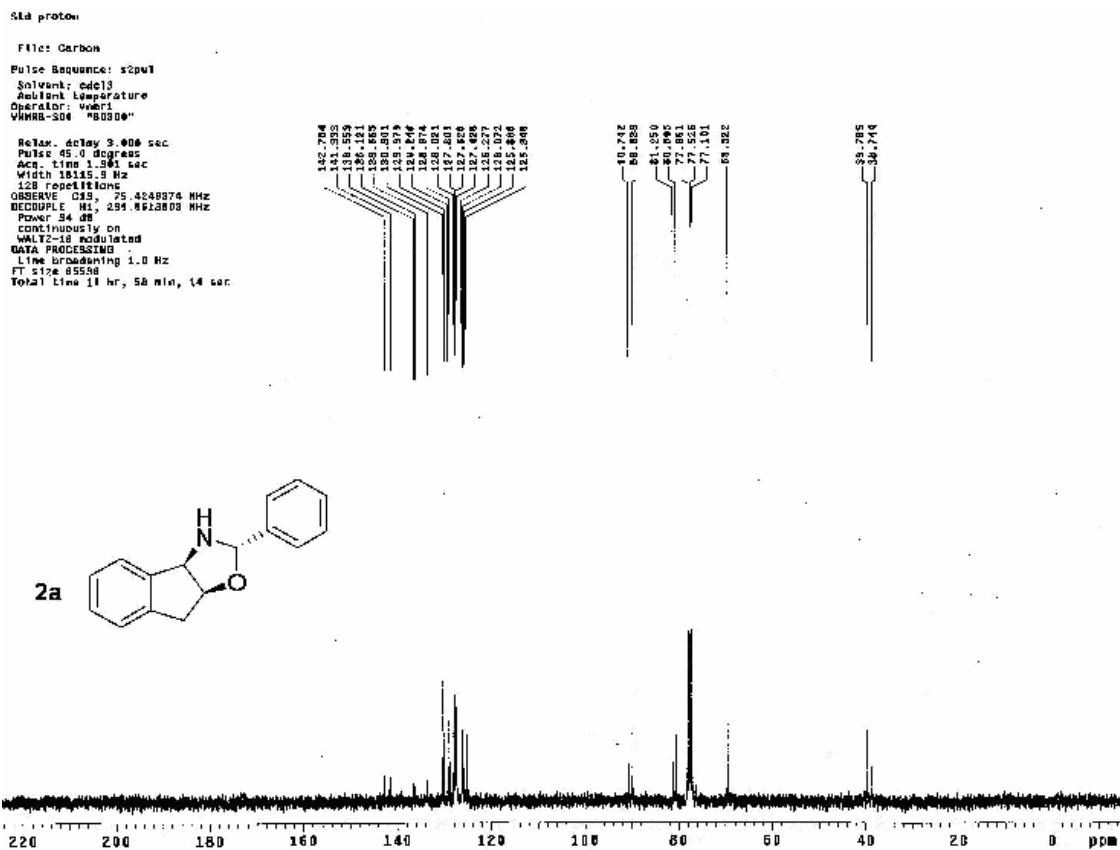

Figure-10 :  $^{13}\text{C}$  NMR NMR spectra of ligand 2b

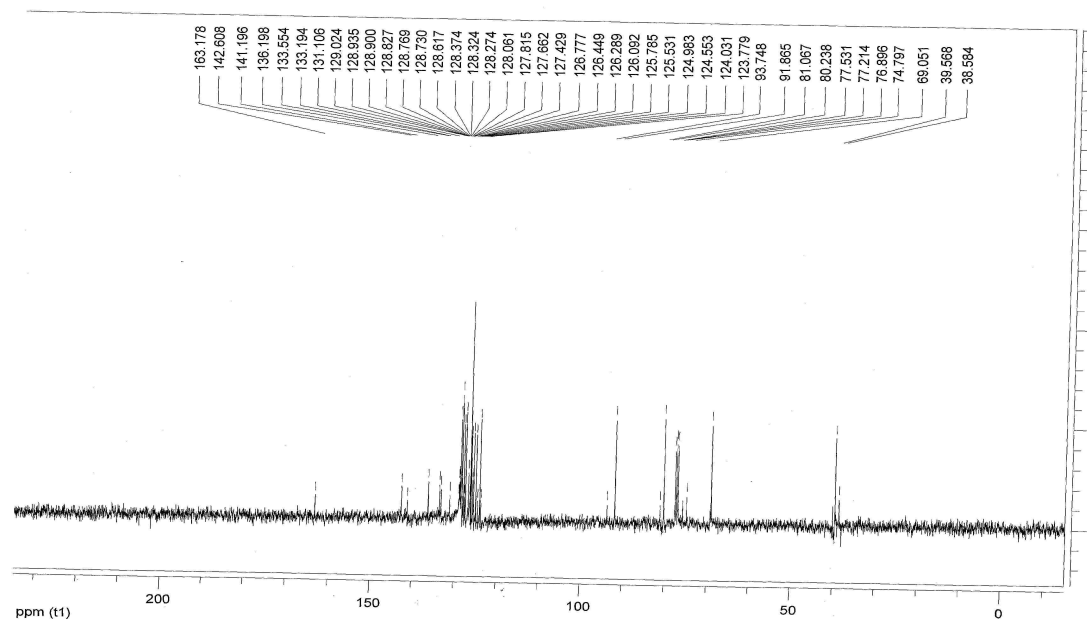

Figure-11 :  $^{13}\text{C}$  NMR NMR spectra of ligand 2c

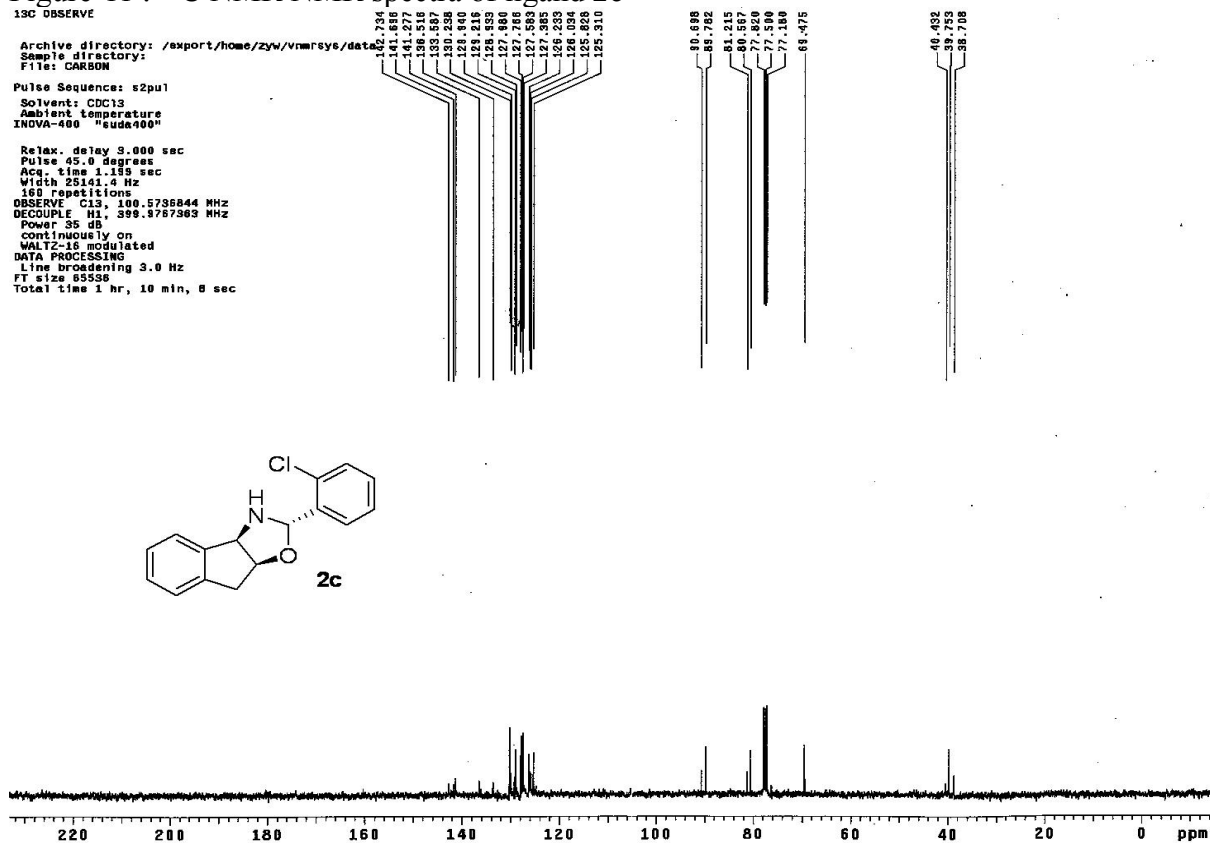

Figure-12 :  $^{13}\text{C}$  NMR NMR spectra of ligand 2d

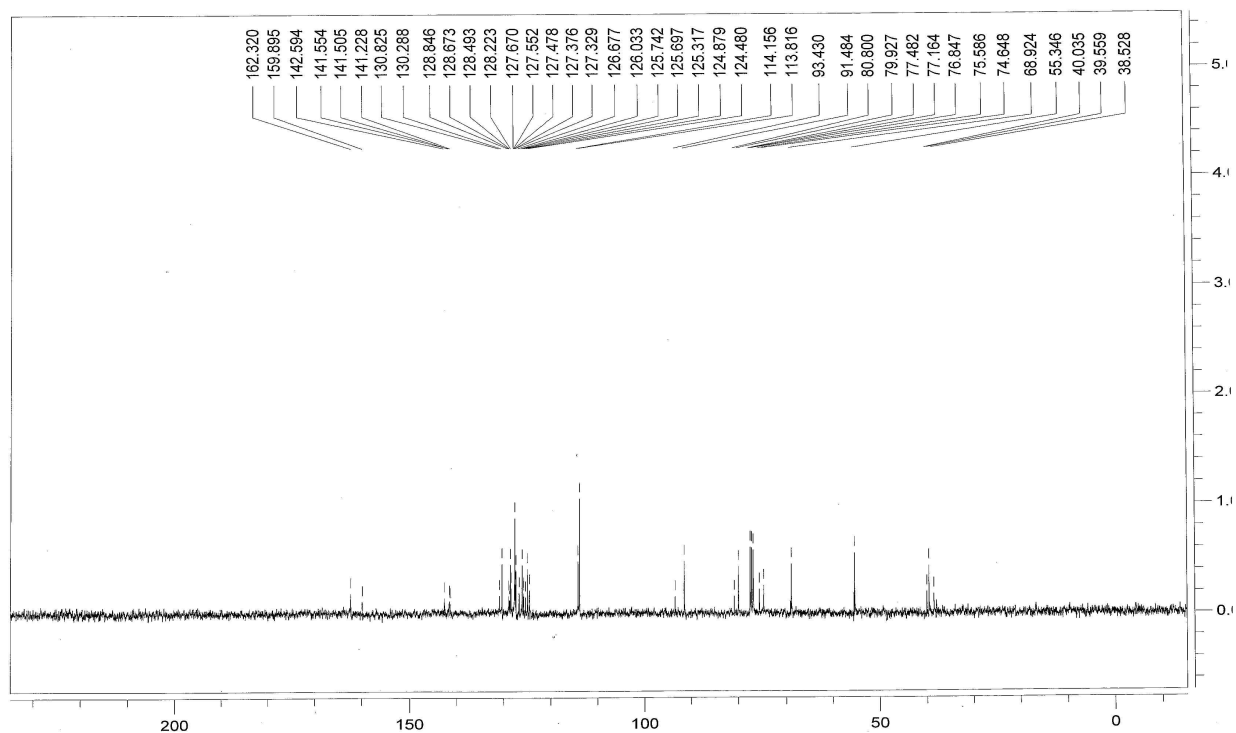

Figure-13: IR spectra of ligand **2a**

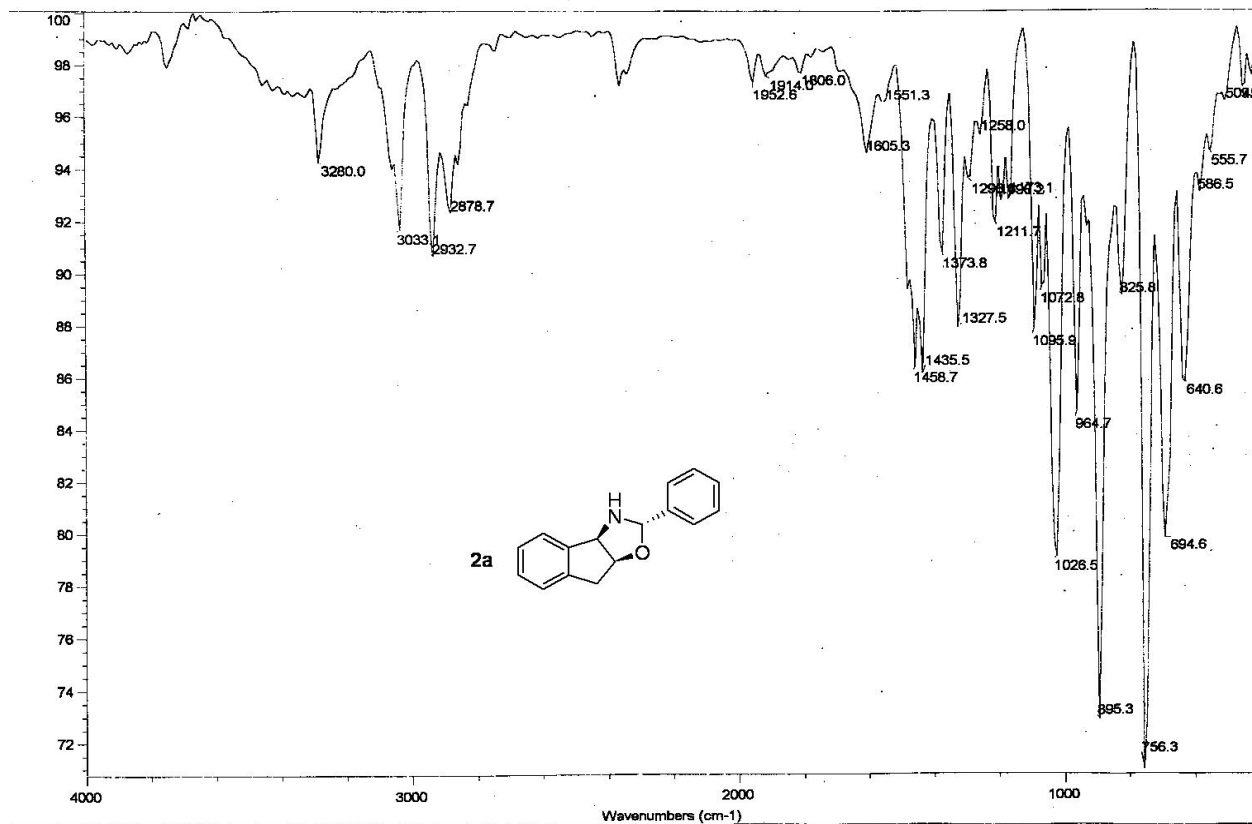

Figure-14: IR spectra of ligand **2b**

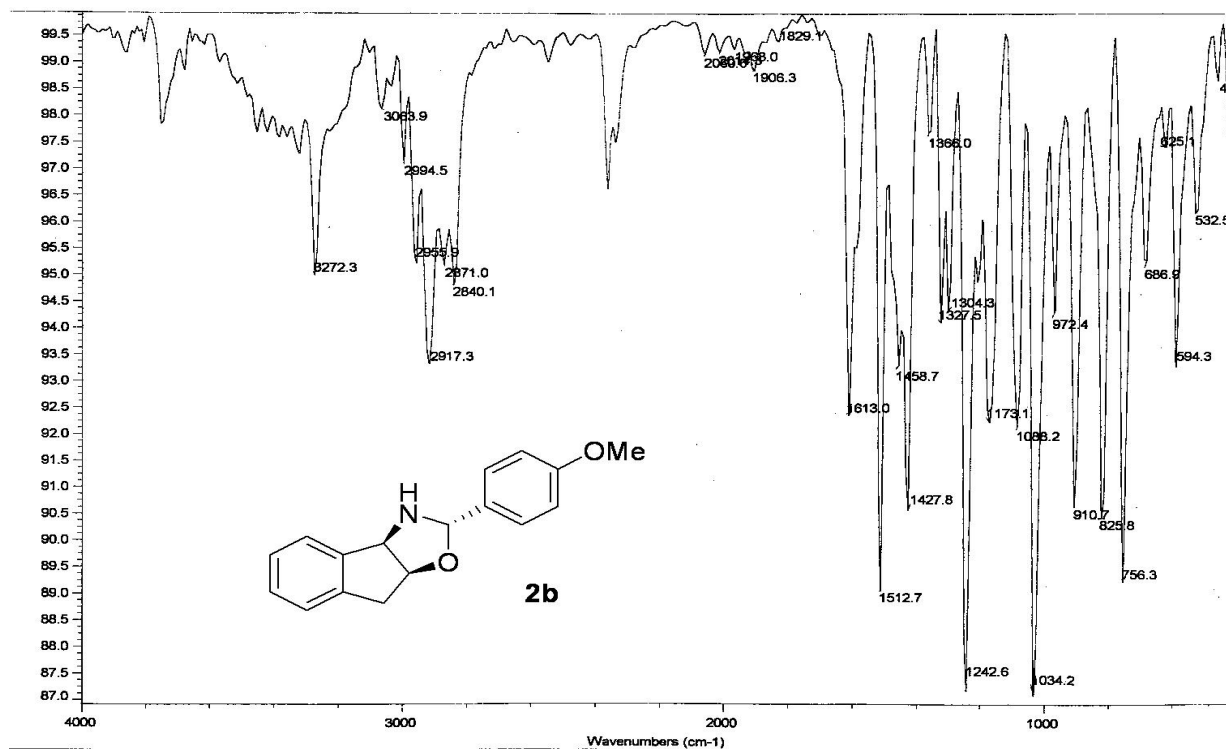



Figure-15: IR spectra of ligand **2c**

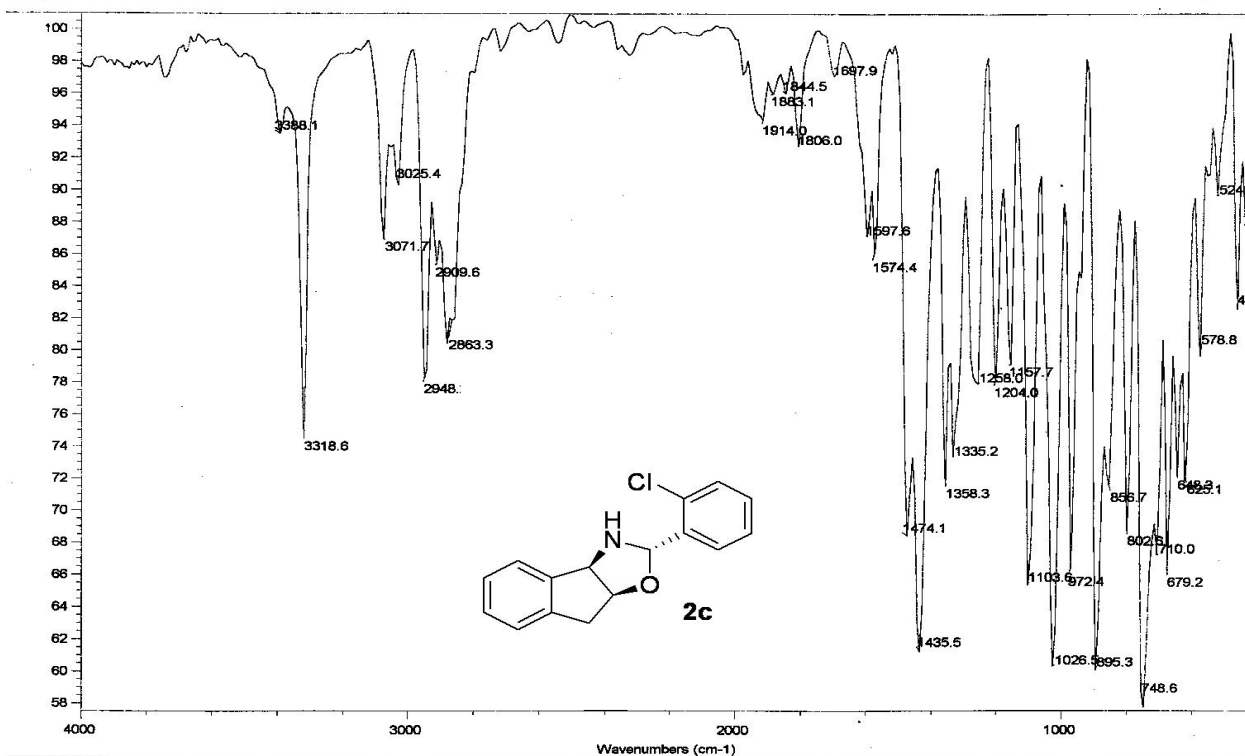

Figure-16: IR spectra of ligand **2d**

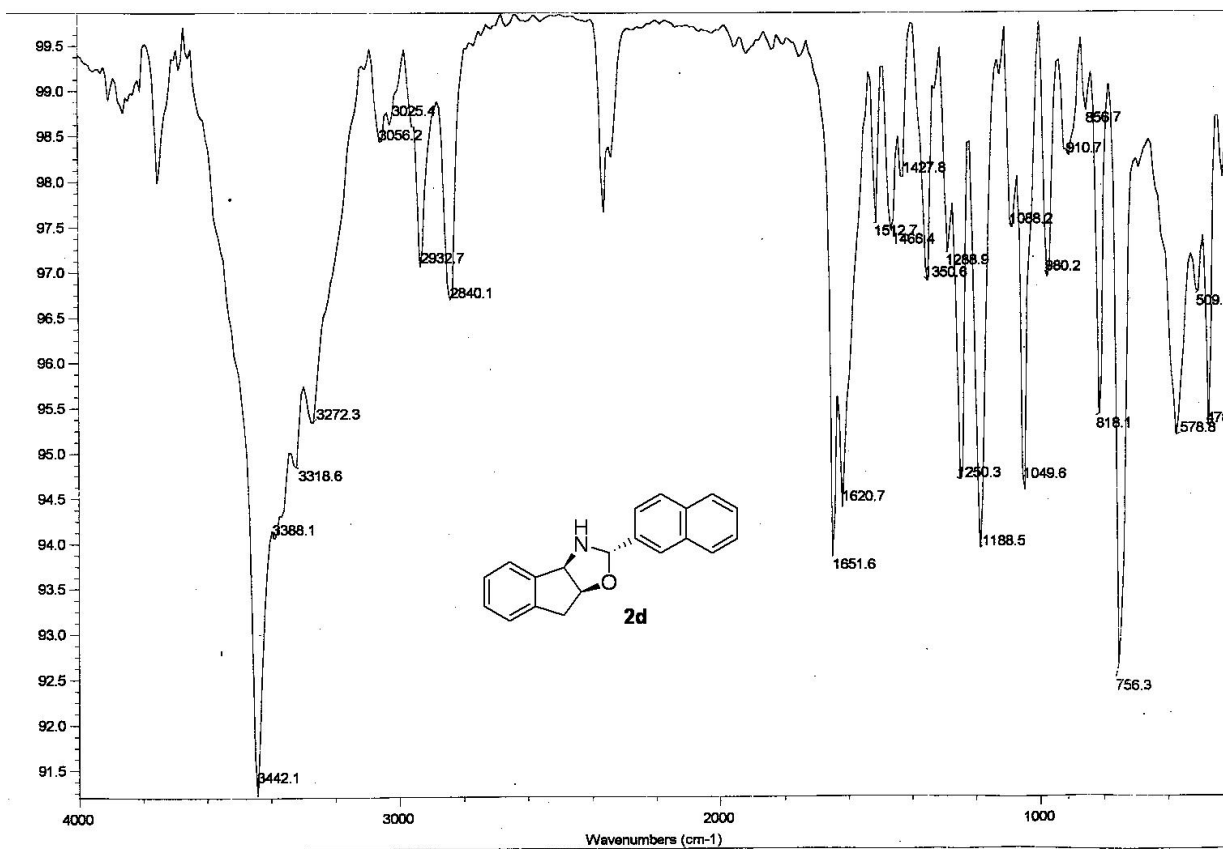



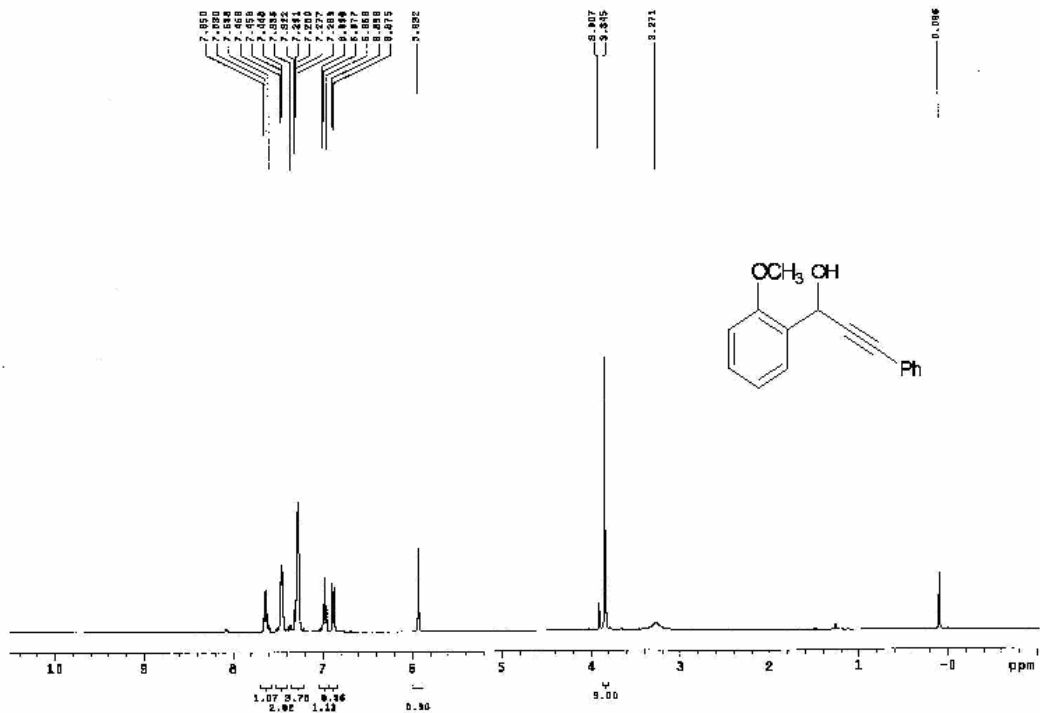

LSC DESERVE

Archive directory: /export/home/zjh/umr/ys/del  
 Sample directory:  
 File: CARSDM  
 Pulse Sequence: s2pul  
 Solvent: CDCl3  
 Ambient temperature  
 INOVA-400 Pcus400  
 Relax. delay 9.000 sec  
 Pulse 45.0 degrees  
 Acq. time 1.135 sec  
 Width 25135.4 Hz  
 64 repetitions  
 DESERVE DIS 140.5704874 MHz  
 DECOUPLE M1 999.9707363 MHz  
 Power 35 dB  
 continuously on  
 WALTZ-16 modulated  
 DATA PROCESSING  
 Line broadening 1.0 Hz  
 FT size 65536  
 Total time 2 hr, 20 min, 14 sec

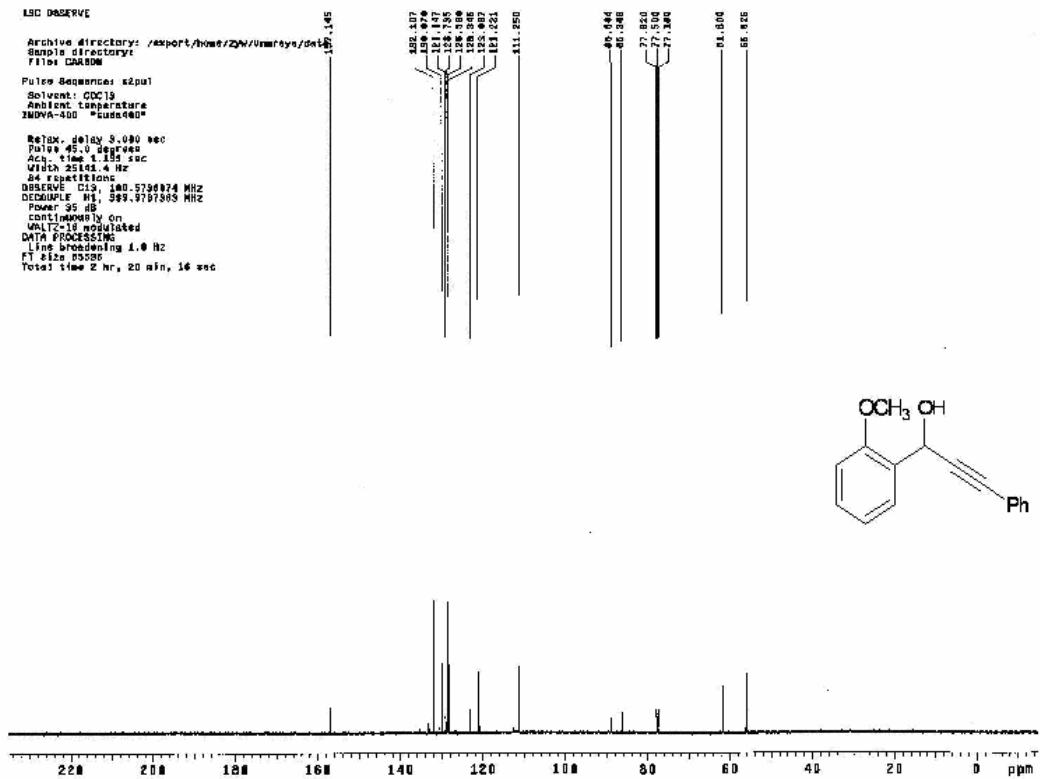

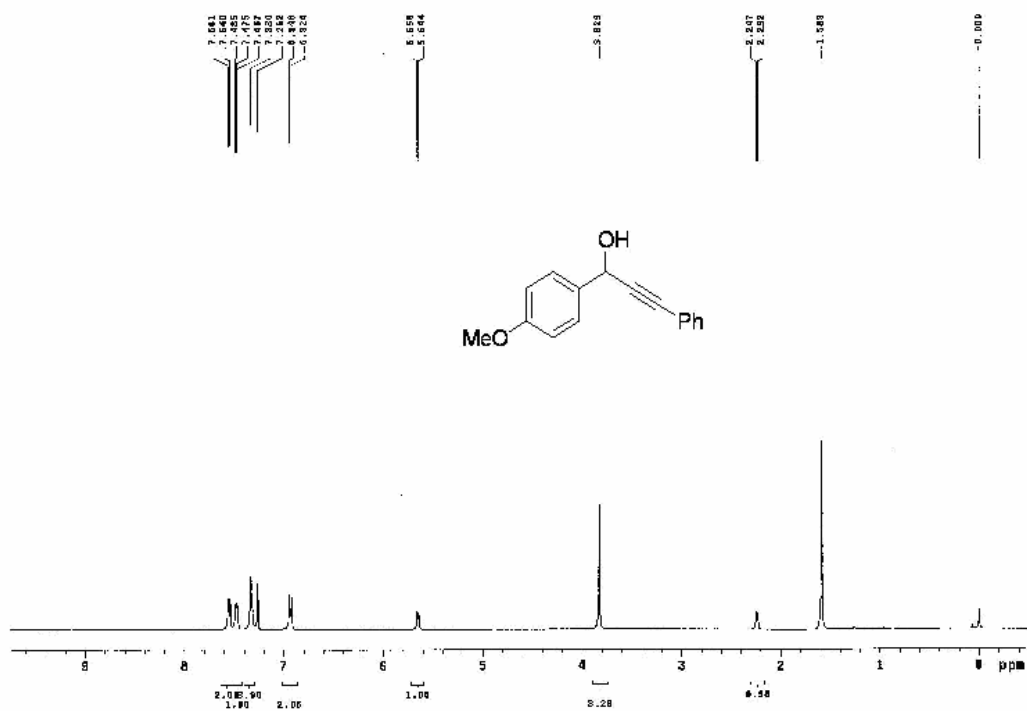

STANDARD IN OBSERVE

Archive directory: /export/home/zyu/nuhfys/data  
 Sample directory:  
 File: CRBD08  
 Pulse Sequence: zgpg30  
 Solvent: CDCl3  
 Ambient Temperature  
 NSVA=010 "cdd404"  
 Relax. delay 3.000 sec  
 Pulse 10.0 degrees  
 Acq. time 1.188 sec  
 Width 23141.8 Hz  
 101 acquisitions  
 OBSERVE: C13, 100.6238874 MHz  
 DECOUPLE: H1, 301.4771363 MHz  
 Power 35 dB  
 Continuously on  
 WALTZ-16 modulated  
 DATA PROCESSING  
 Line Broadening 3.0 Hz  
 FT size 65536  
 Total time 1 hr., 10 min., 8 sec

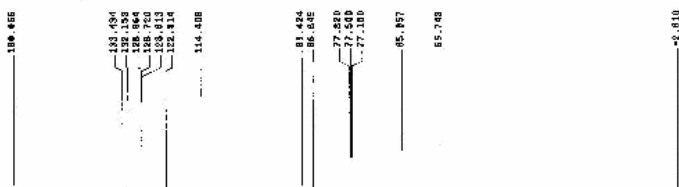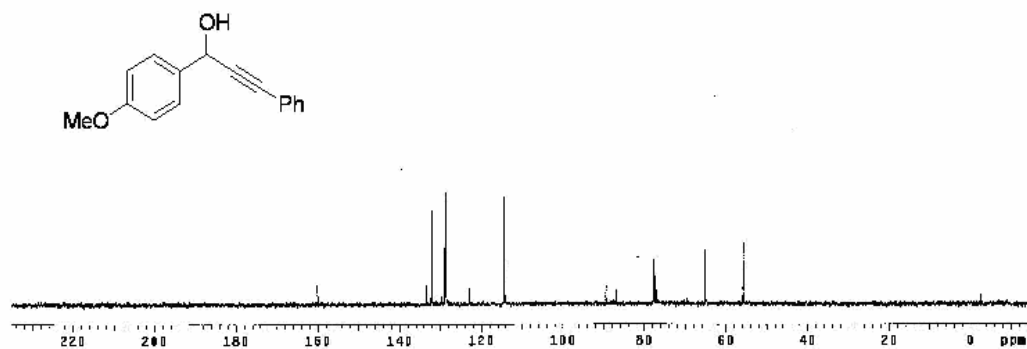

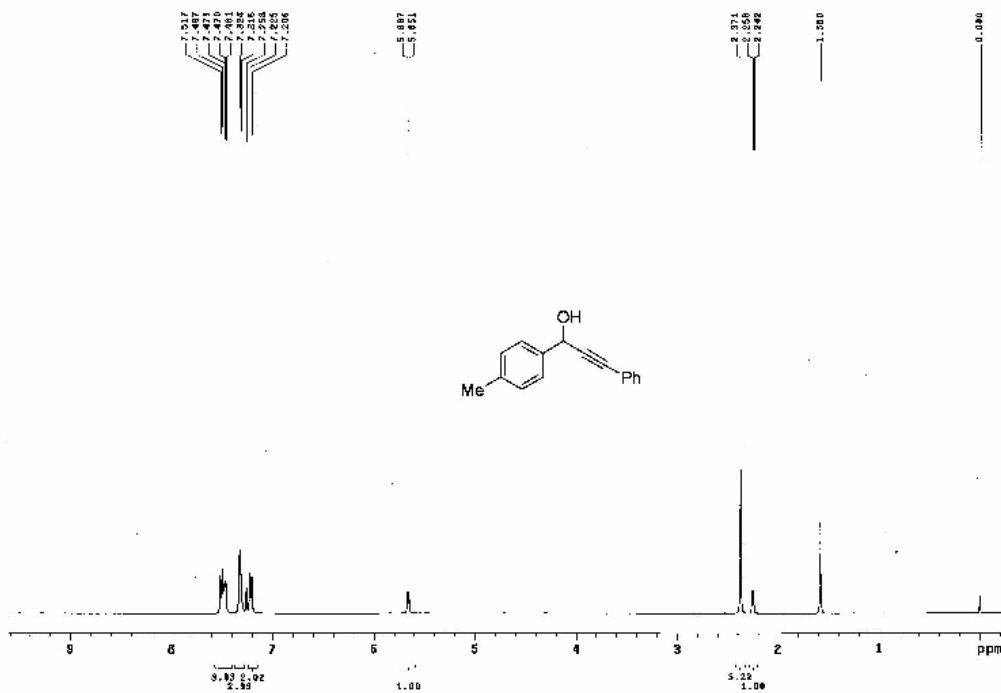

STANDARD IN OBSERVE

Archive directory: jreport/home/200/vnmr/s1/data  
 Sample directory:  
 File: 045008

Pulse Sequence: s2pat

Solvent: CDCl3  
 Ambient temperature  
 INOVA-400 "huda400"

Relax. delay 3.000 sec  
 Pulse 45.0 degrees  
 Acq. time 1.189 sec  
 Width 20343.4 Hz  
 54 repetitions

DECOUPLE: C13, 100.625000 MHz  
 DECOUPLE: H1, 399.377100 MHz  
 Power 35 dB  
 continuously on  
 WALTZ-16 modulated  
 DATA PROCESSING  
 Line broadening 0.0 Hz  
 FI size 65536  
 Total time 3 hr, 16 min, 8 sec

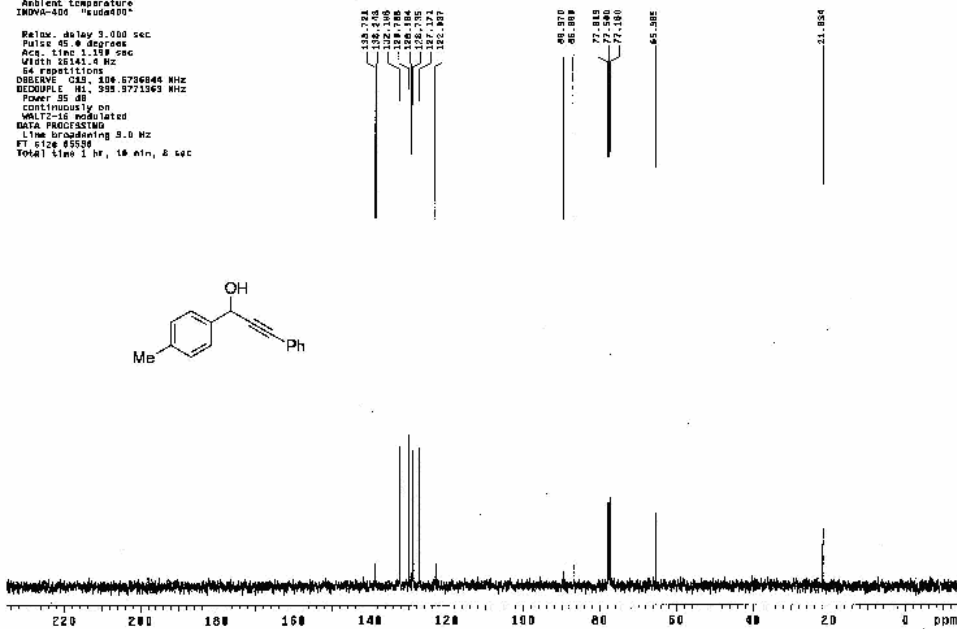



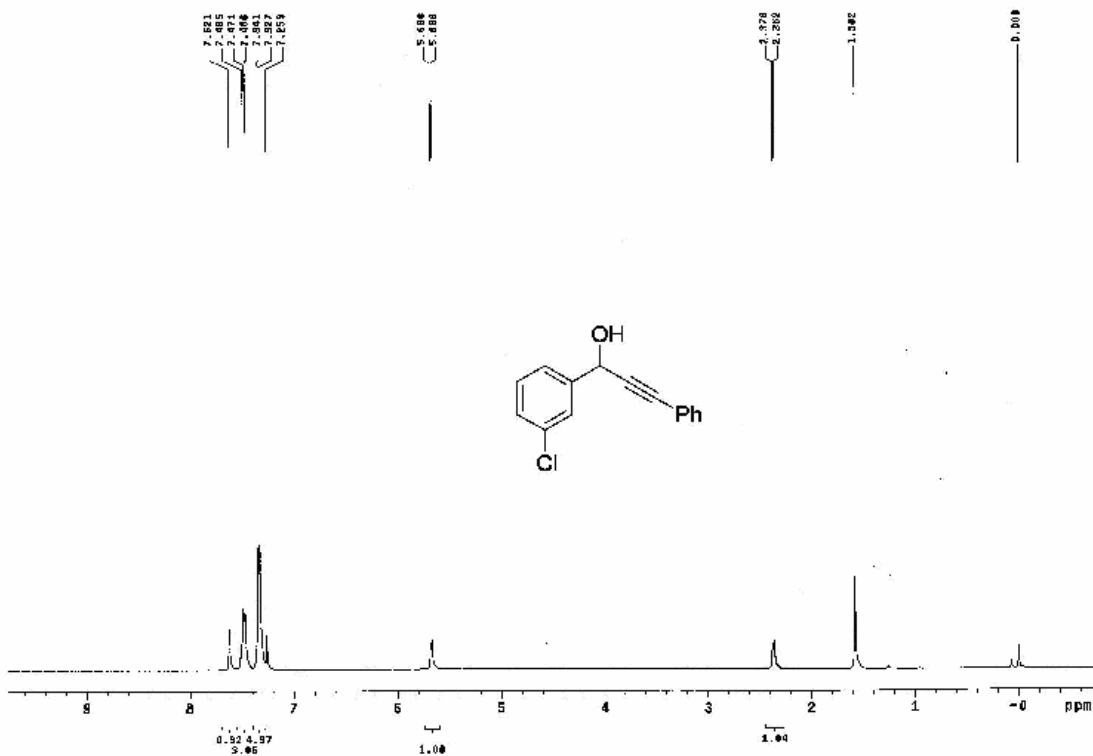

STANDARD IN OBSERVE

Archive directory: /export/home/zyw/wwm/eye/data  
 Sample directory:  
 File: CARBON

Pulse Sequence: s2pu1

Solvent: CDCl3  
 Ambient temperature  
 INOVA-100 400MHz

Relax. delay 3.000 sec  
 Pulse 40.0 degree  
 Acq. time 1.191 sec  
 Width 23141.4 Hz  
 100 repetitions  
 DESCRIBE C13, 100.5738750 MHz  
 DECOUPLE H1, 309.971980 MHz  
 Power 29 dB  
 continuously on  
 WALTZ-16 modulated  
 DATA PROCESSING  
 Line broadening 3.0 Hz  
 FT size 65536  
 Total time 1 hr, 10 min, 6 sec

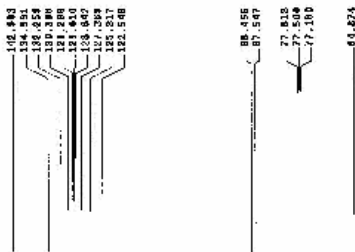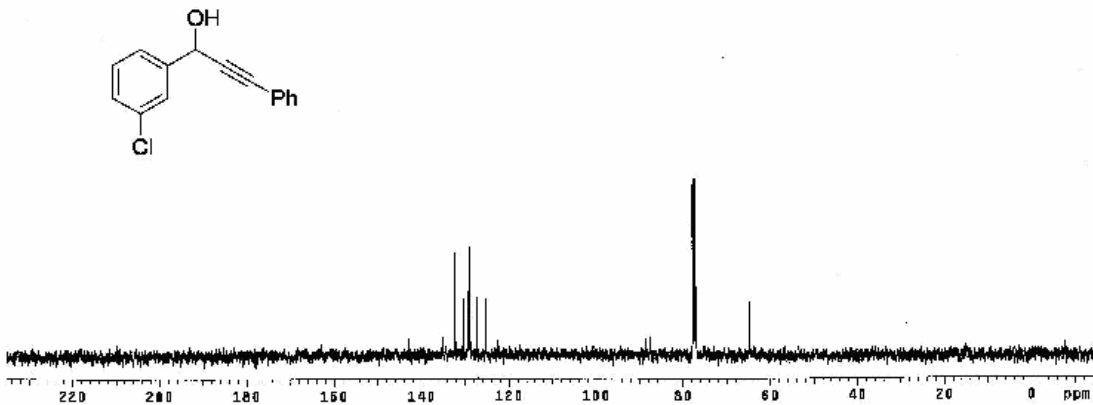

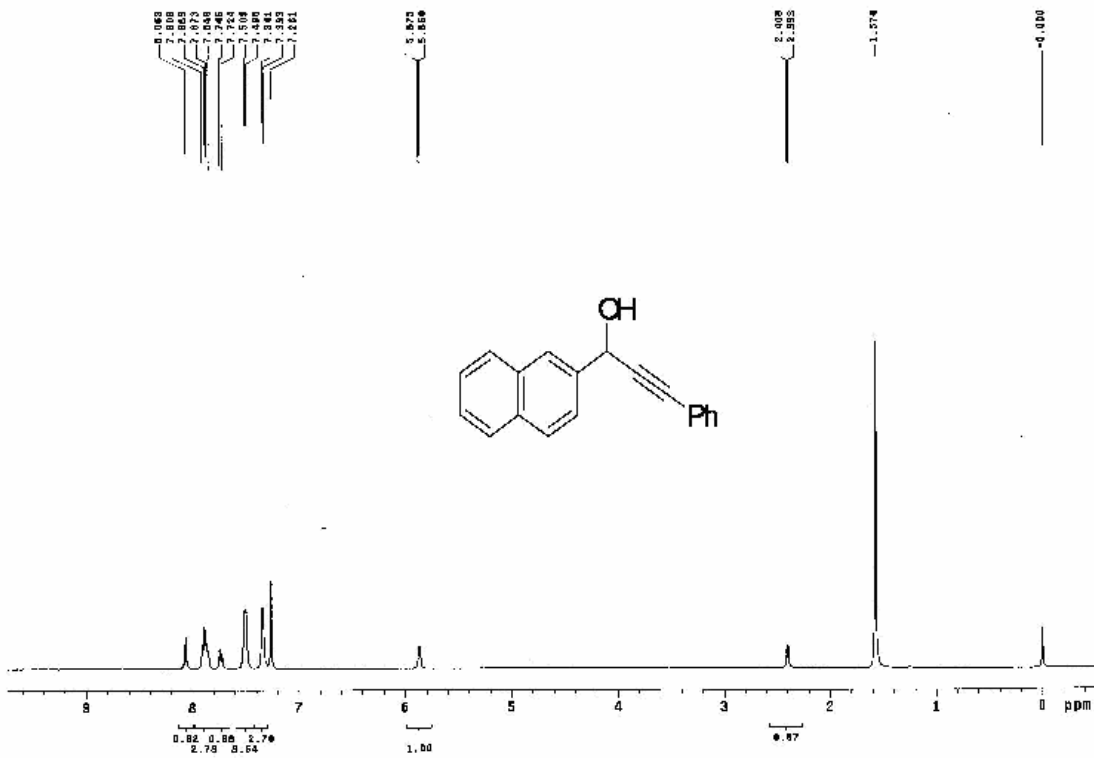

STANDARD IN OBSERVE

Archive directory: /export/home/zyw/vrms/sys/data  
 Sample directory:  
 File: 4NRD0N  
 Pulse Sequence: zgpg1  
 Solvent: CDCl3  
 Reagent temperature:  
 INOVA-400 150MHz500  
 Relax. delay 8.000 sec  
 Pulse 45.0 degree  
 Acq. time 1.199 sec  
 Width 25141.4 Hz  
 120 repetition  
 OBSERVE G13, 100.622630 MHz  
 DECOUPLE H1, 299.171262 MHz  
 Power 30 dB  
 continuously on  
 WALTZ-16 modulated  
 DATA PROCESSING  
 Line broadening 5.0 Hz  
 FT size 65536  
 Total time 1 hr, 19 min, 8 sec

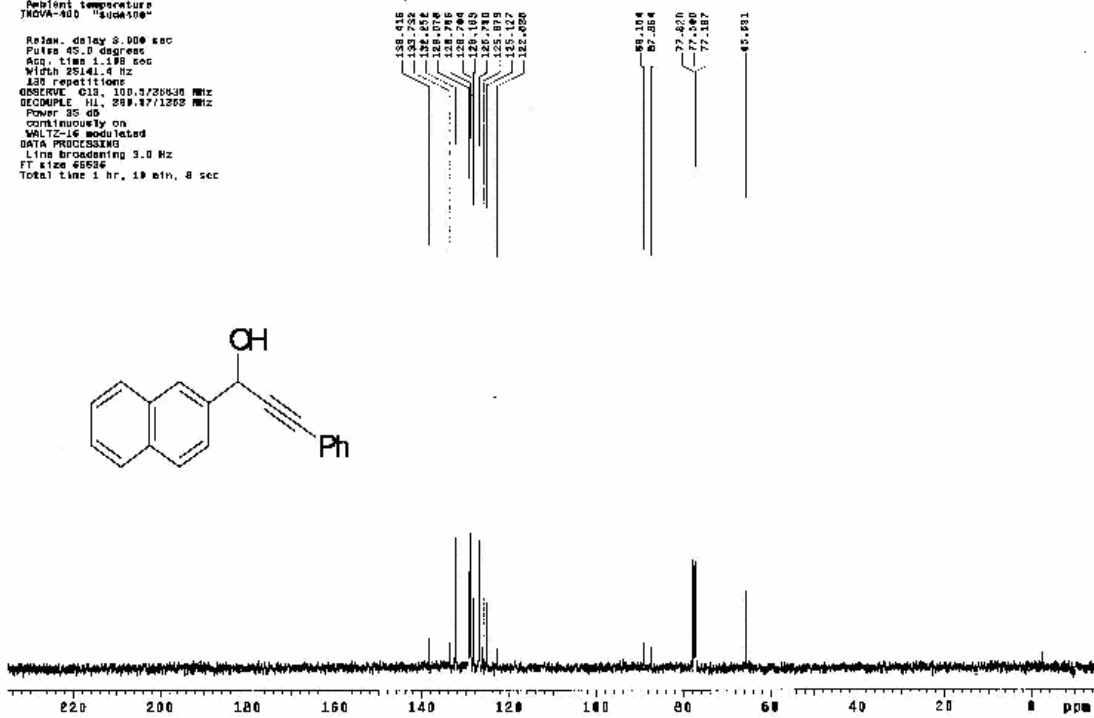



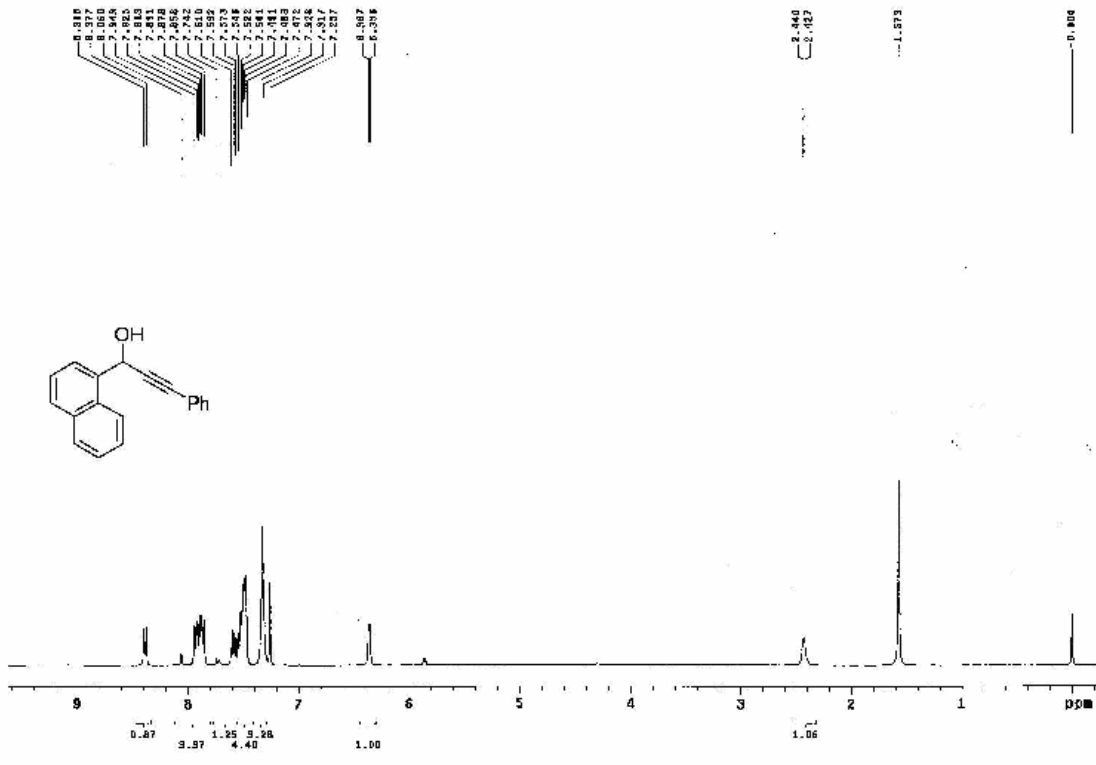

STANDARD IN OBSERVE

Archive directory: /export/home/zyw/wmrcsys/data  
 Sample directory:  
 File: CARBON

Pulse Sequence: zgpg1  
 Solvent: CDCl3  
 Ambient temperature  
 INOVA-400 \*hubs400\*

Relax. delay 3.000 sec  
 Pulse 45.0 degree  
 Acq. time 1.195 sec  
 Width 25141.4 Hz  
 152 FID POINTS

OBSERVE C13, 100.5798805 MHz  
 DECOUPLE H1, 505.9771565 MHz  
 Power 35 dB  
 continuously on  
 WALTZ-16 modulated  
 DATA PROCESSING  
 Line broadening 3.0 Hz  
 FT size 65536  
 Total time 1 hr, 10 min, 6 sec

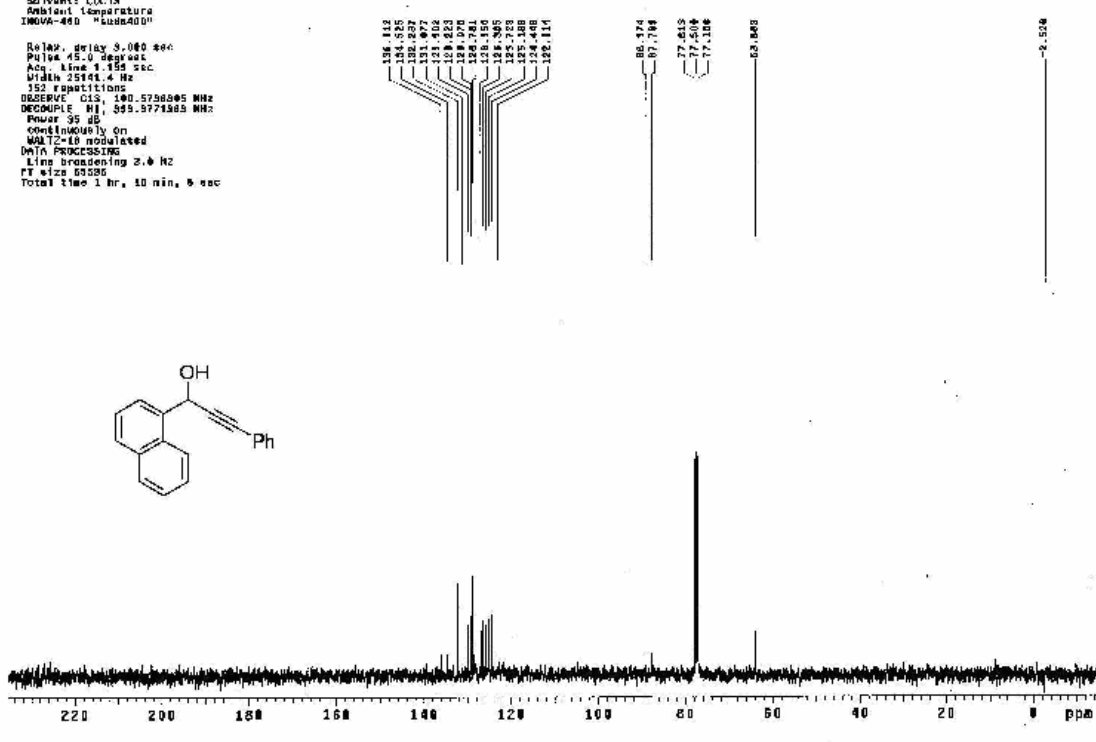

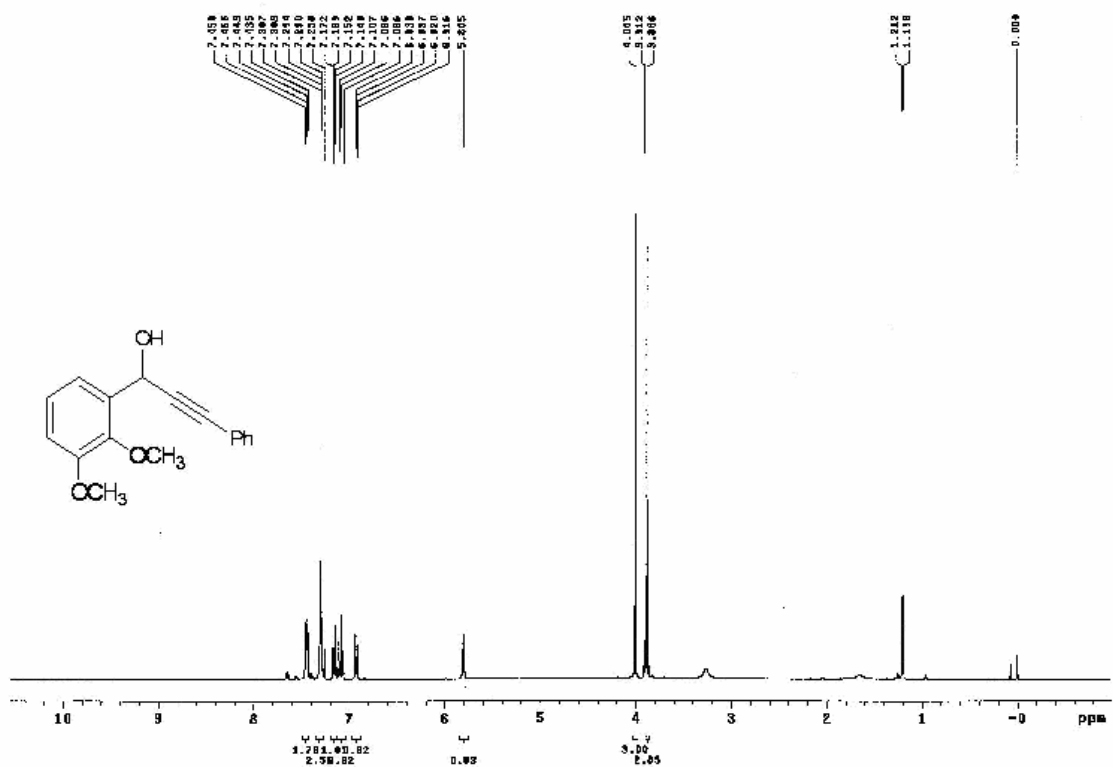

13C OBSERVE

Archive directory: /export/home/zgw/vm/srvc/data  
 Sample directory:  
 File: C8K008  
 Pulse Sequence: zgpg30  
 Solvent: CDCl3  
 Ambient temperature  
 INOVA-400 "suda400"  
 Relax. delay 3.000 sec  
 Pulse 45.0 degree  
 Acq. time 1.189 sec  
 Width 23161.4 Hz  
 SS repetitions  
 OBSERVE CH, 100.6296806 MHz  
 DECOUPLE H3, 888.8767863 MHz  
 Power 35 dB  
 Continuously on  
 WALTZ-16 modulated  
 DATA PROCESSING  
 Line broadening 1.0 Hz  
 FT size 85538  
 Total time 1 hr, 16 min, 8 sec

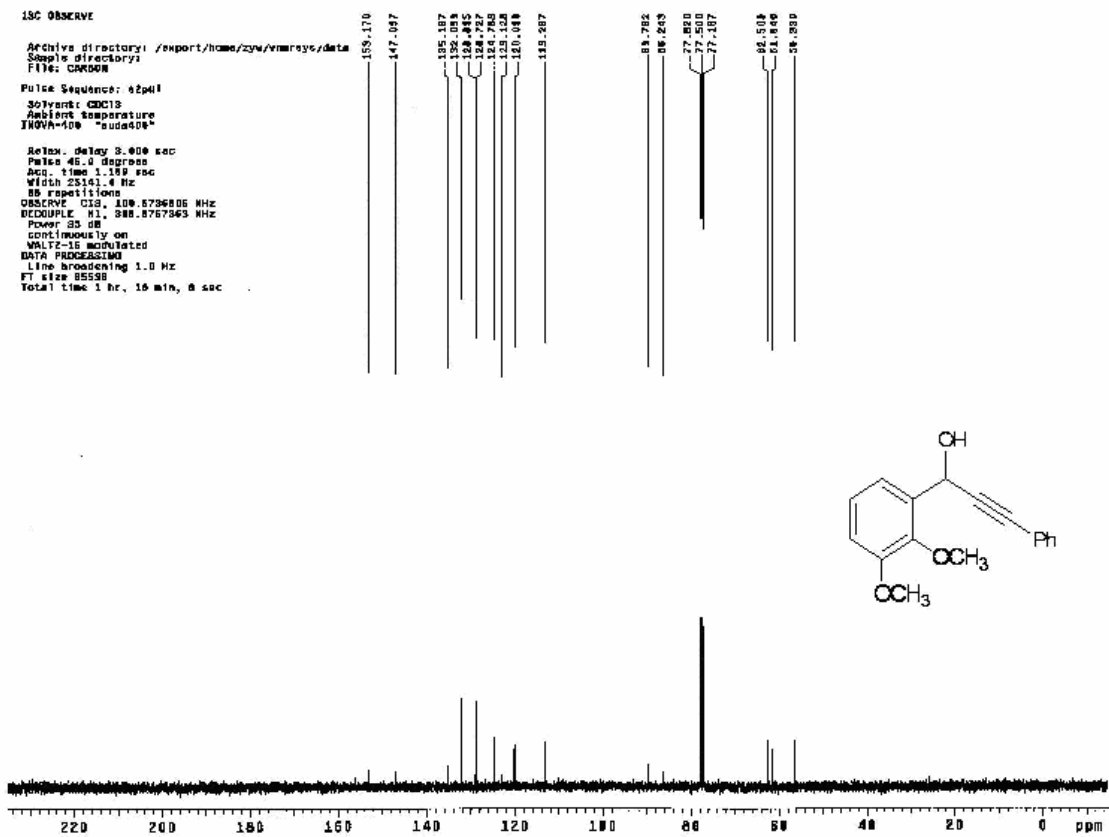

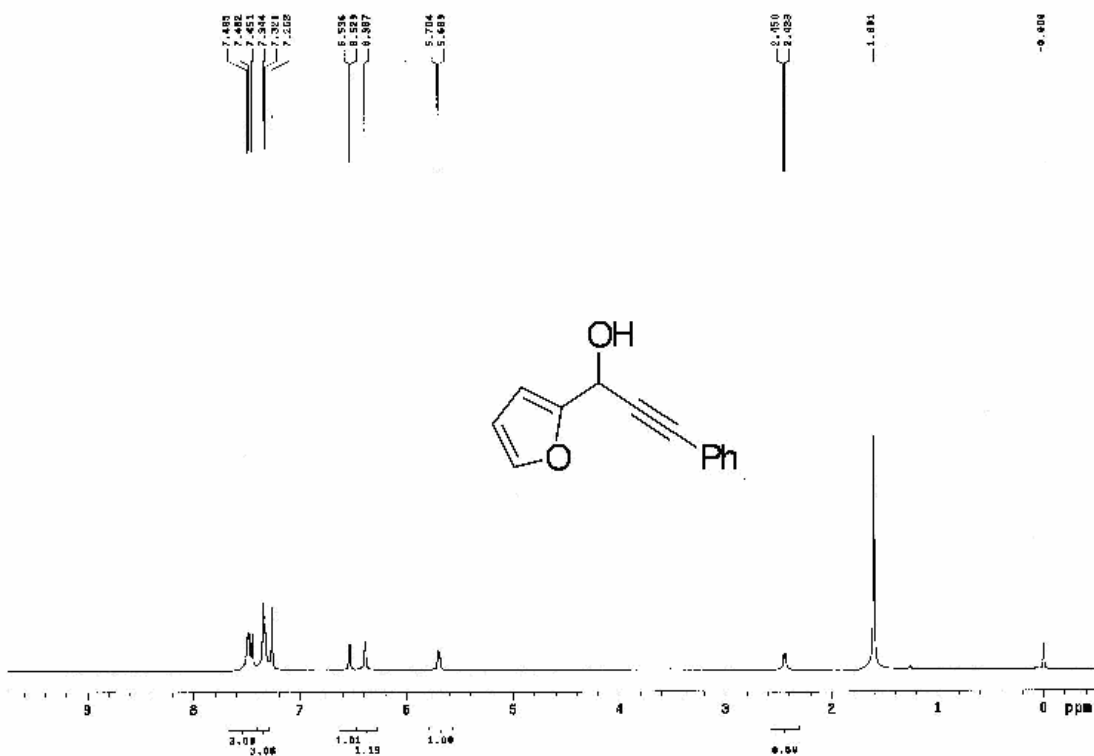

STANDARD 1H OBSERVE

Archive directory /export/home/zyw/wmrcys/data  
 Sample directory /  
 File: CARBDW  
 Pulse Sequence: zgpg30  
 Solvent: CDCl3  
 Ambient temperature:  
 INVTM-300 "cudu400"  
 Relax delay 3.000 sec  
 Pulse 45.0 degree  
 Acq. time 1.131 sec  
 Width 25141.4 Hz  
 48 repetitions  
 OBSERVE: C13, 100.6296882 MHz  
 DECOUPLE: H1, 338.8771563 MHz  
 Power 35 dB  
 continuously on  
 WALTZ-16 modulated  
 DATA PROCESSING  
 Line broadening 9.0 Hz  
 FT size 85598  
 Total time 1 hr, 10 min, 8 sec

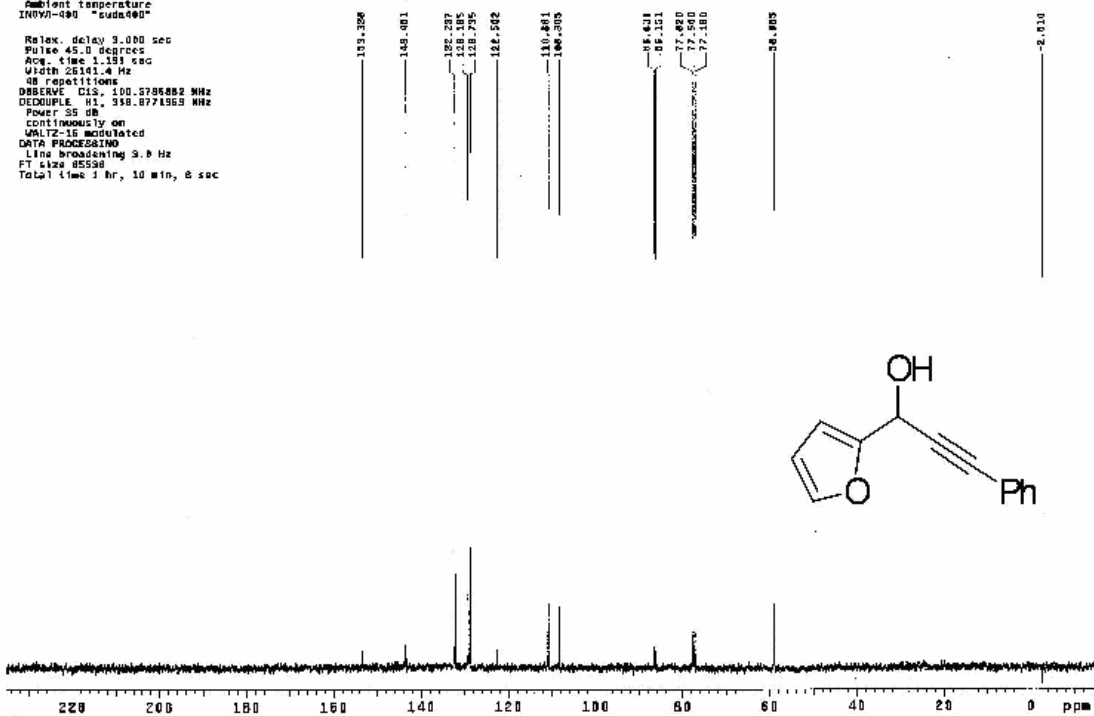

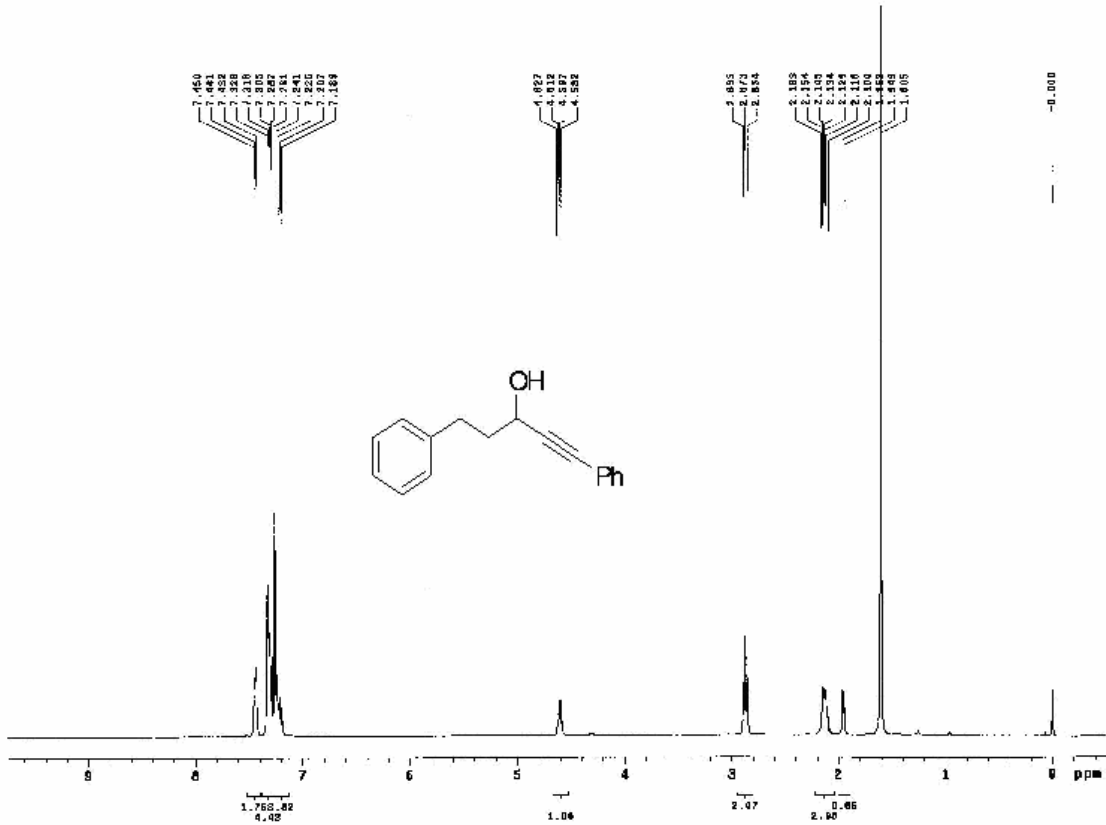

STANDARD 1H OBSERVE

Archive directory: /export/home/zyw/pw/mrksy/data  
 Sample directory:  
 File: CARBDM  
 Pulse sequence: e2pul  
 Solvent: CDCl3  
 Ambient temperature  
 INOVA-400 "sno360"

Relax. delay: 3.000 sec  
 Pulse: 45.0 degrees  
 Acq. time: 1.159 sec  
 Width: 25141.4 Hz  
 64 repetitions  
 OBSERVE CH1, 100.5786874 MHz  
 F2DCDRIF H1, 399.9771569 MHz  
 Power: 35 dB  
 Continuously on  
 WALTZ-16 modulated  
 2D IN PROCESSING  
 Line broadening: 0.0 Hz  
 FT size: 8536  
 Total time: 1 hr, 10 min, 6 sec

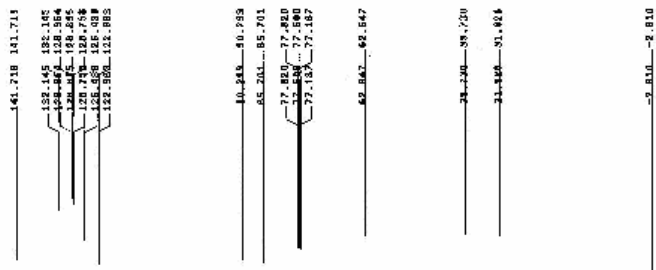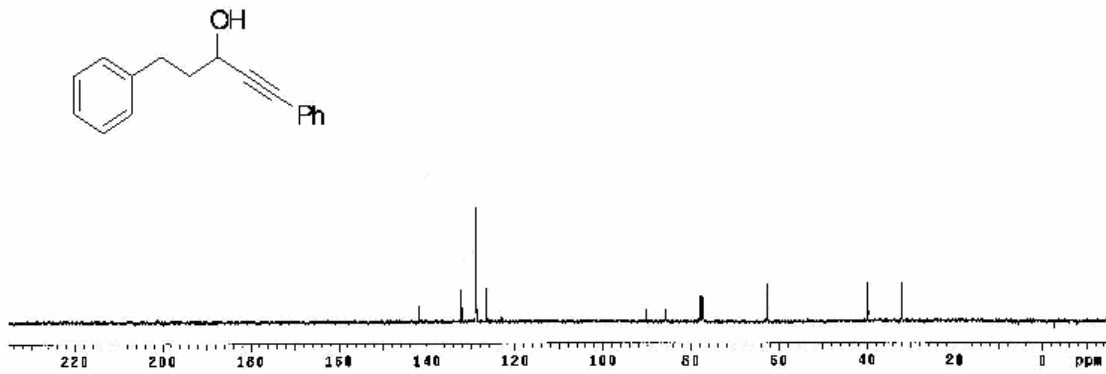

Copies of the HPLC Data

**Empower 2**

**SZX**

| SAMPLE INFORMATION |                        |                     |              |
|--------------------|------------------------|---------------------|--------------|
| Sample Name:       | xz-6                   | Acquired By:        | System       |
| Sample Type:       | Unknown                | Sample Set Name:    |              |
| Vial:              | 605                    | Acq. Method Set:    | szx          |
| Injection #:       | 8                      | Processing Method:  | szx          |
| Injection Volume:  | 20.00 ul               | Channel Name:       | 254.0nm      |
| Run Time:          | 18.0 Minutes           | Proc. Chnl. Descr.: | PDA 254.0 nm |
| Date Acquired:     | 2007-7-10 13:24:47 CST |                     |              |
| Date Processed:    | 2007-7-10 13:44:29 CST |                     |              |

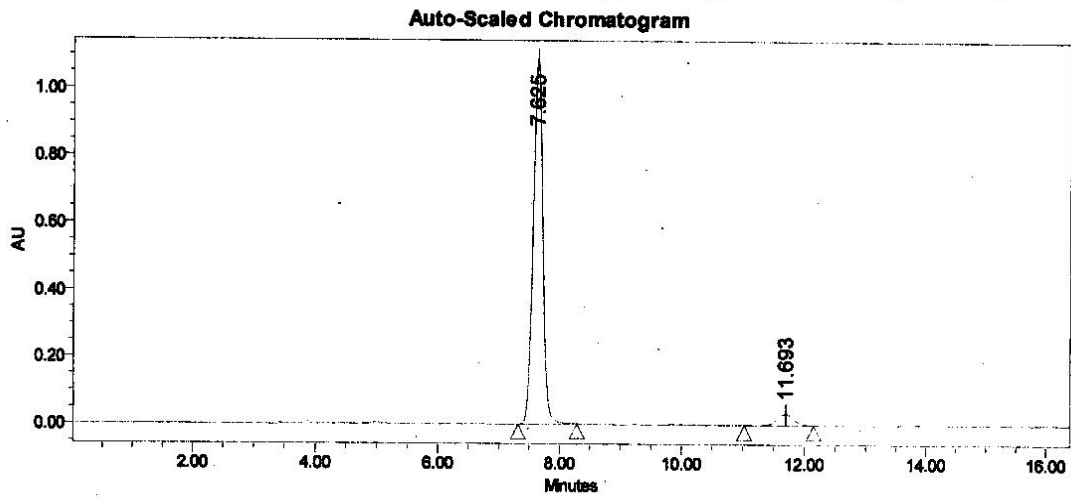

**Peak Results**

|   | RT     | Area     | % Area | Height  | Amount | Units |
|---|--------|----------|--------|---------|--------|-------|
| 1 | 7.825  | 11918992 | 94.93  | 1094461 |        |       |
| 2 | 11.693 | 635844   | 5.07   | 33875   |        |       |

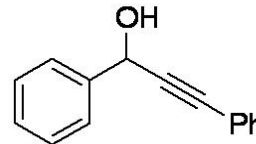

Reported by User: System  
 Report Method: szx  
 Report Method ID 1050  
 Page: 1 of 2

Project Name: szx  
 Date Printed:  
 2007-7-10  
 13:44:53 PRC

## SAMPLE INFORMATION

|                   |                        |                     |              |
|-------------------|------------------------|---------------------|--------------|
| Sample Name:      | xz-3                   | Acquired By:        | System       |
| Sample Type:      | Unknown                | Sample Set Name:    |              |
| Vial:             | 605                    | Acq. Method Set:    | szx          |
| Injection #:      | 4                      | Processing Method:  | szx          |
| Injection Volume: | 20.00 ul               | Channel Name:       | 254.0nm      |
| Run Time:         | 12.0 Minutes           | Proc. Chnl. Descr.: | PDA 254.0 nm |
| Date Acquired:    | 2007-9-13 10:43:45 CST |                     |              |
| Date Processed:   | 2007-9-13 11:00:52 CST |                     |              |

## Auto-Scaled Chromatogram

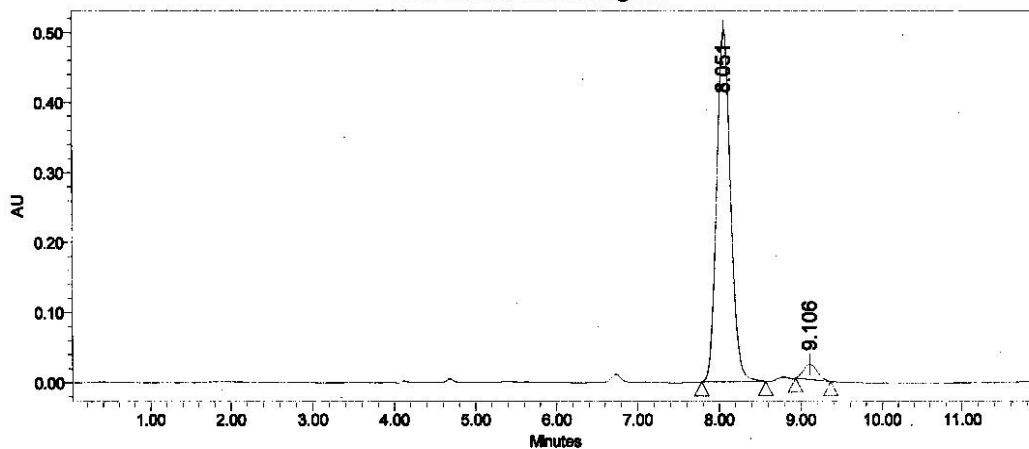

## Peak Results

|   | RT    | Area    | % Area | Height | Amount | Units |
|---|-------|---------|--------|--------|--------|-------|
| 1 | 8.051 | 5963526 | 95.82  | 504405 |        |       |
| 2 | 9.106 | 260384  | 4.18   | 21422  |        |       |

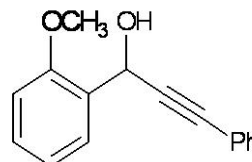

Reported by User: System  
Report Method: szx  
Report Method ID 4116  
Page: 1 of 2

Project Name: szx  
Date Printed:  
2007-9-13  
11:01:24 PRC

## SAMPLE INFORMATION

|                   |                        |                     |              |
|-------------------|------------------------|---------------------|--------------|
| Sample Name:      | xz-10                  | Acquired By:        | System       |
| Sample Type:      | Unknown                | Sample Set Name:    |              |
| Vial:             | 605                    | Acq. Method Set:    | szx          |
| Injection #:      | 6                      | Processing Method:  | szx          |
| Injection Volume: | 20.00 ul               | Channel Name:       | 254.0nm      |
| Run Time:         | 25.0 Minutes           | Proc. Chnl. Descr.: | PDA 254.0 nm |
| Date Acquired:    | 2007-7-13 15:10:42 CST |                     |              |
| Date Processed:   | 2007-7-13 15:29:15 CST |                     |              |

Auto-Scaled Chromatogram

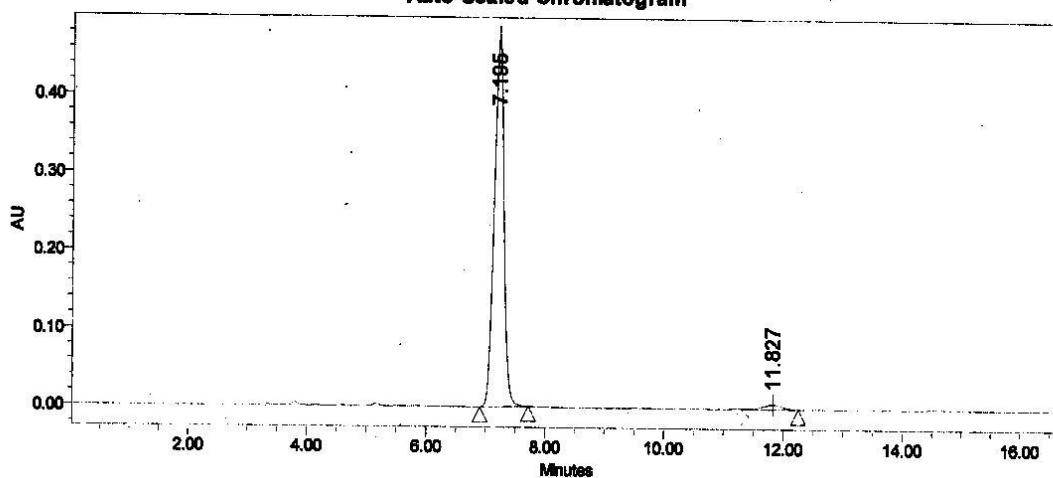

Peak Results

|   | RT     | Area    | % Area | Height | Amount | Units |
|---|--------|---------|--------|--------|--------|-------|
| 1 | 7.195  | 5422084 | 97.29  | 476875 |        |       |
| 2 | 11.827 | 151249  | 2.71   | 6103   |        |       |

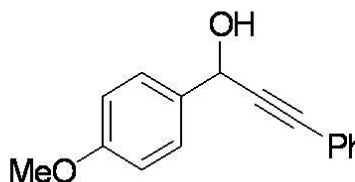

Reported by User: System  
 Report Method: szx  
 Report Method ID 4116  
 Page: 1 of 2

Project Name: szx  
 Date Printed:  
 2007-7-13  
 15:29:34 PRC

## SAMPLE INFORMATION

|                   |                        |                     |              |
|-------------------|------------------------|---------------------|--------------|
| Sample Name:      | xz-3                   | Acquired By:        | System       |
| Sample Type:      | Unknown                | Sample Set Name:    |              |
| Vial:             | 605                    | Acq. Method Set:    | szx          |
| Injection #:      | 3                      | Processing Method:  | szx          |
| Injection Volume: | 20.00 ul               | Channel Name:       | 254.0nm      |
| Run Time:         | 30.0 Minutes           | Proc. Chnl. Descr.: | PDA 254.0 nm |
| Date Acquired:    | 2007-7-10 10:59:39 CST |                     |              |
| Date Processed:   | 2007-7-10 11:18:55 CST |                     |              |

Auto-Scaled Chromatogram

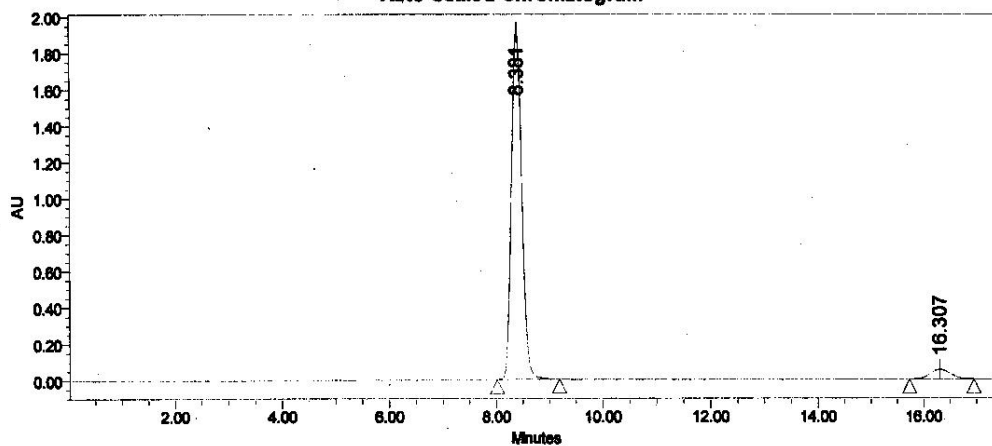

Peak Results

|   | RT     | Area     | % Area | Height  | Amount | Units |
|---|--------|----------|--------|---------|--------|-------|
| 1 | 8.381  | 26007252 | 94.92  | 1912229 |        |       |
| 2 | 16.307 | 1392076  | 5.08   | 52957   |        |       |

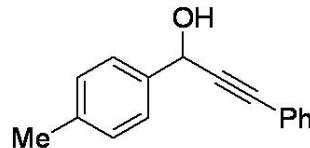

Reported by User: System  
 Report Method: szx  
 Report Method ID 1050  
 Page: 1 of 2

Project Name: szx  
 Date Printed:  
 2007-7-10  
 11:18:33 PRC



## SAMPLE INFORMATION

|                   |                        |                     |              |
|-------------------|------------------------|---------------------|--------------|
| Sample Name:      | xz-2                   | Acquired By:        | System       |
| Sample Type:      | Unknown                | Sample Set Name:    |              |
| Vial:             | 605                    | Acq. Method Set:    | szx          |
| Injection #:      | 2                      | Processing Method:  | szx          |
| Injection Volume: | 20.00 $\mu$ l          | Channel Name:       | 254.0nm      |
| Run Time:         | 11.0 Minutes           | Proc. Chnl. Descr.: | PDA 254.0 nm |
| Date Acquired:    | 2007-7-10 10:48:06 CST |                     |              |
| Date Processed:   | 2007-7-10 11:01:10 CST |                     |              |

## Auto-Scaled Chromatogram

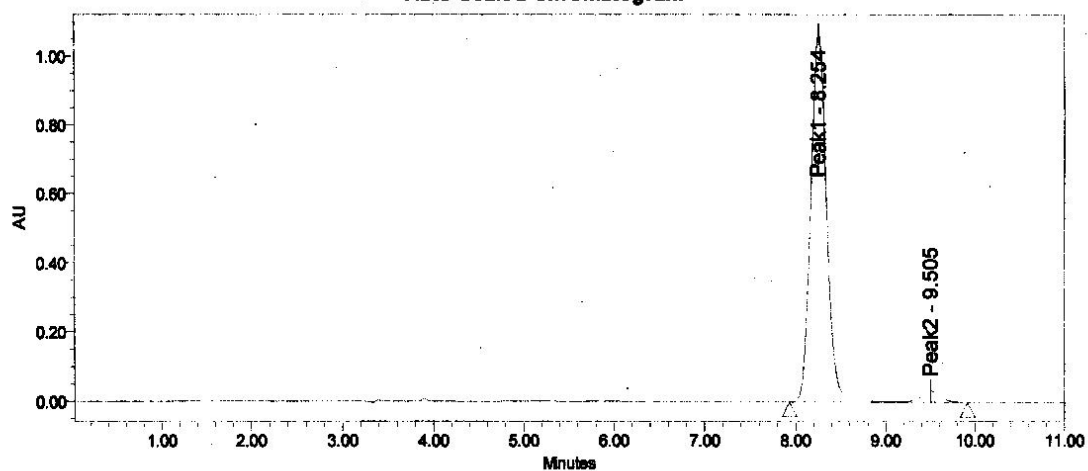

## Peak Results

|   | RT    | Area     | % Area | Height  | Amount | Units |
|---|-------|----------|--------|---------|--------|-------|
| 1 | 8.254 | 12877327 | 98.31  | 1070312 |        |       |
| 2 | 9.505 | 493541   | 3.69   | 33103   |        |       |

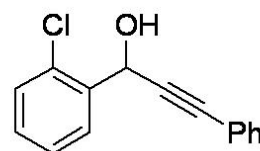

Reported by User: System  
Report Method: szx  
Report Method ID 1050  
Page: 1 of 2

Project Name: szx  
Date Printed:  
2007-7-10  
11:02:19 PRC

## SAMPLE INFORMATION

|                   |                        |                     |              |
|-------------------|------------------------|---------------------|--------------|
| Sample Name:      | xz-1                   | Acquired By:        | System       |
| Sample Type:      | Unknown                | Sample Set Name:    |              |
| Vial:             | 605                    | Acq. Method Set:    | szx          |
| Injection #:      | 6                      | Processing Method:  | szx          |
| Injection Volume: | 20.00 ul               | Channel Name:       | 254.0nm      |
| Run Time:         | 18.5 Minutes           | Proc. Chnl. Descr.: | PDA 254.0 nm |
| Date Acquired:    | 2007-7-10 12:31:06 CST |                     |              |
| Date Processed:   | 2007-7-10 12:51:36 CST |                     |              |

## Auto-Scaled Chromatogram

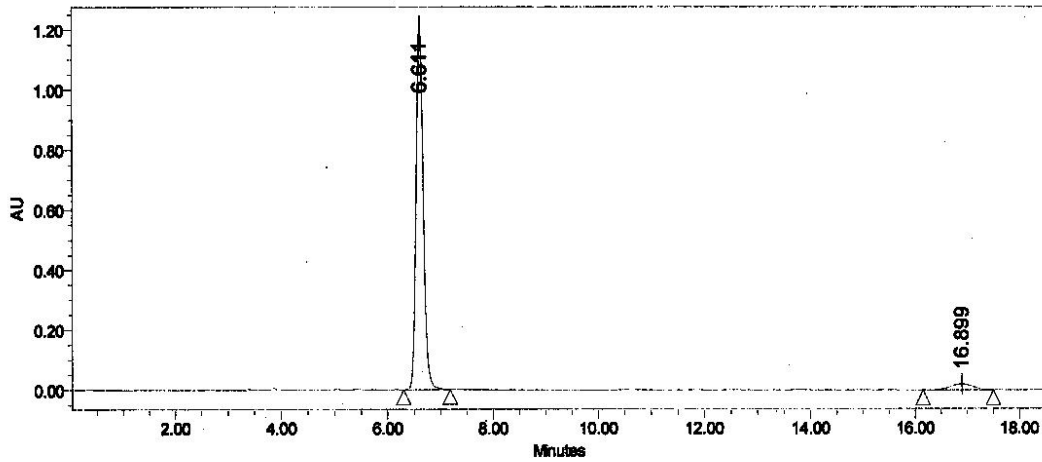

## Peak Results

|   | RT     | Area     | % Area | Height  | Amount | Units |
|---|--------|----------|--------|---------|--------|-------|
| 1 | 6.611  | 11588831 | 95.25  | 1217324 |        |       |
| 2 | 16.899 | 577728   | 4.75   | 19771   |        |       |

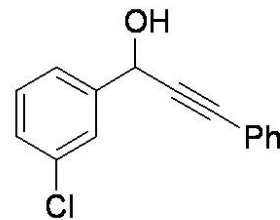

Reported by User: System  
Report Method: szx  
Report Method ID 1050  
Page: 1 of 2

Project Name: szx  
Date Printed:  
2007-7-10  
12:52:22 PRC

## SAMPLE INFORMATION

|                   |                        |                     |              |
|-------------------|------------------------|---------------------|--------------|
| Sample Name:      | xz-7                   | Acquired By:        | System       |
| Sample Type:      | Unknown                | Sample Set Name:    |              |
| Vial:             | 605                    | Acq. Method Set:    | szx          |
| Injection #:      | 4                      | Processing Method:  | szx          |
| Injection Volume: | 20.00 ul               | Channel Name:       | 254.0nm      |
| Run Time:         | 25.0 Minutes           | Proc. Chnl. Descr.: | PDA 254.0 nm |
| Date Acquired:    | 2007-7-13 14:31:36 CST |                     |              |
| Date Processed:   | 2007-7-13 14:55:03 CST |                     |              |

## Auto-Scaled Chromatogram

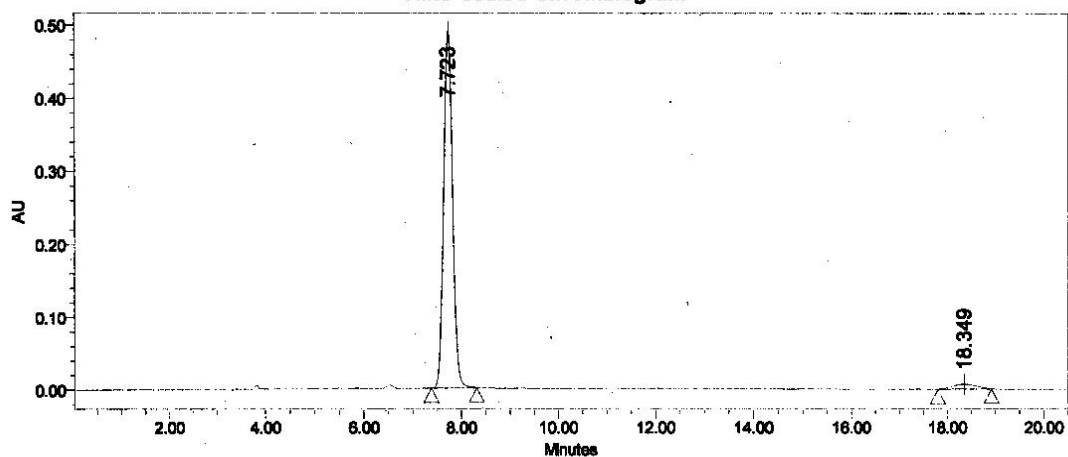

## Peak Results

|   | RT     | Area    | % Area | Height | Amount | Units |
|---|--------|---------|--------|--------|--------|-------|
| 1 | 7.723  | 8254583 | 98.45  | 490735 |        |       |
| 2 | 18.349 | 230220  | 3.55   | 6874   |        |       |

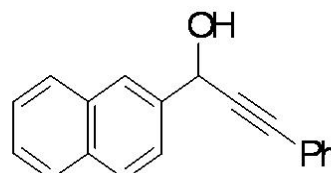

Reported by User: System  
 Report Method: szx  
 Report Method ID 4116  
 Page: 1 of 2

Project Name: szx  
 Date Printed:  
 2007-7-13  
 14:56:01 PRC

## SAMPLE INFORMATION

|                   |                        |                     |              |
|-------------------|------------------------|---------------------|--------------|
| Sample Name:      | xz-4                   | Acquired By:        | System       |
| Sample Type:      | Unknown                | Sample Set Name:    |              |
| Vial:             | 605                    | Acq. Method Set:    | szx          |
| Injection #:      | 7                      | Processing Method:  | szx          |
| Injection Volume: | 20.00 ul               | Channel Name:       | 254.0nm      |
| Run Time:         | 20.0 Minutes           | Proc. Chnl. Descr.: | PDA 254.0 nm |
| Date Acquired:    | 2007-7-10 12:50:09 CST |                     |              |
| Date Processed:   | 2007-7-10 13:16:42 CST |                     |              |

Auto-Scaled Chromatogram

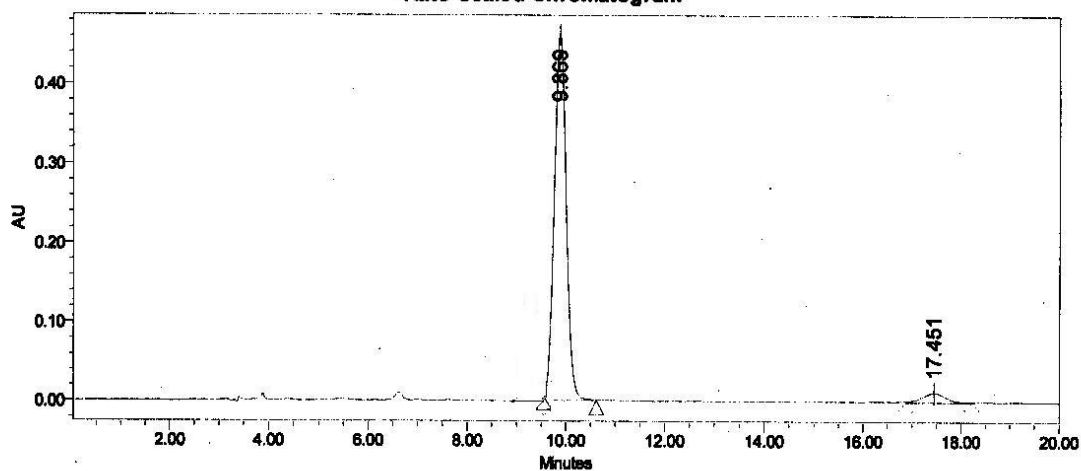

Peak Results

|   | RT     | Area    | % Area | Height | Amount | Units |
|---|--------|---------|--------|--------|--------|-------|
| 1 | 9.889  | 7799558 | 95.11  | 482514 |        |       |
| 2 | 17.451 | 400764  | 4.89   | 11886  |        |       |

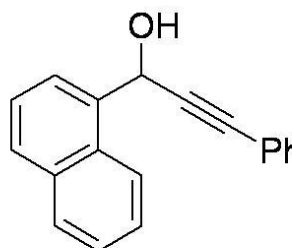

Reported by User: System  
 Report Method: szx  
 Report Method ID 1050  
 Page: 1 of 2

Project Name: szx  
 Date Printed:  
 2007-7-10  
 13:25:11 PRC

## SAMPLE INFORMATION

|                   |                        |                     |              |
|-------------------|------------------------|---------------------|--------------|
| Sample Name:      | xz-2                   | Acquired By:        | System       |
| Sample Type:      | Unknown                | Sample Set Name:    |              |
| Vial:             | 605                    | Acq. Method Set:    | szx          |
| Injection #:      | 2                      | Processing Method:  | szx          |
| Injection Volume: | 20.00 ul               | Channel Name:       | 254.0nm      |
| Run Time:         | 11.0 Minutes           | Proc. Chnl. Descr.: | PDA 254.0 nm |
| Date Acquired:    | 2007-7-10 10:48:06 CST |                     |              |
| Date Processed:   | 2007-7-10 11:01:10 CST |                     |              |

## Auto-Scaled Chromatogram

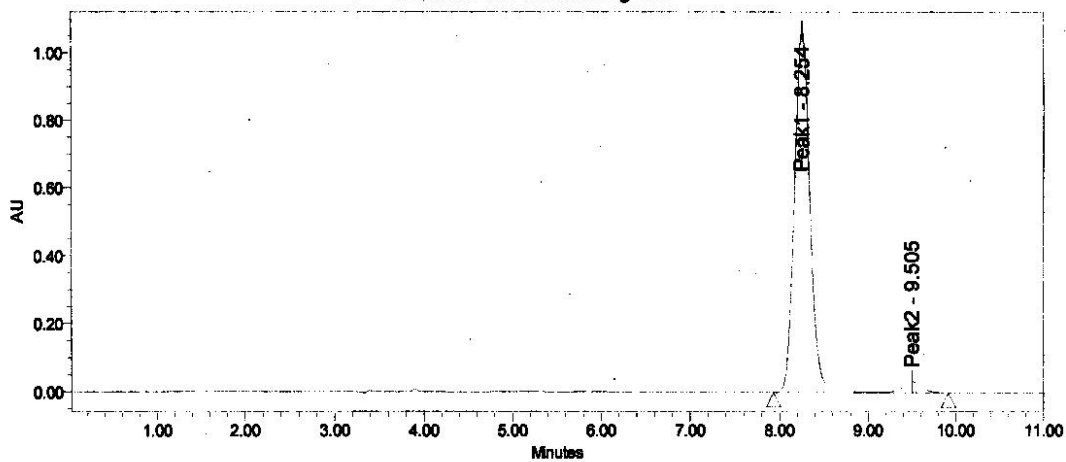

## Peak Results

|   | RT    | Area     | % Area | Height  | Amount | Units |
|---|-------|----------|--------|---------|--------|-------|
| 1 | 8.254 | 12877327 | 96.31  | 1070312 |        |       |
| 2 | 9.505 | 493541   | 3.69   | 33103   |        |       |

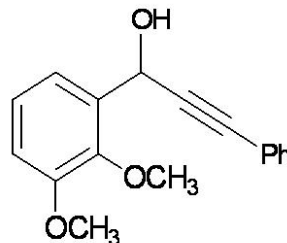

Reported by User: System  
 Report Method: szx  
 Report Method ID 1050  
 Page: 1 of 2

Project Name: szx  
 Date Printed:  
 2007-7-10  
 11:02:19 PRC

## SAMPLE INFORMATION

|                   |                        |                     |              |
|-------------------|------------------------|---------------------|--------------|
| Sample Name:      | xz-9                   | Acquired By:        | System       |
| Sample Type:      | Unknown                | Sample Set Name:    |              |
| Vial:             | 605                    | Acq. Method Set:    | szx          |
| Injection #:      | 3                      | Processing Method:  | szx          |
| Injection Volume: | 20.00 ul               | Channel Name:       | 254.0nm      |
| Run Time:         | 20.0 Minutes           | Proc. Chnl. Descr.: | PDA 254.0 nm |
| Date Acquired:    | 2007-7-13 14:20:02 CST |                     |              |
| Date Processed:   | 2007-7-13 14:32:40 CST |                     |              |

Auto-Scaled Chromatogram

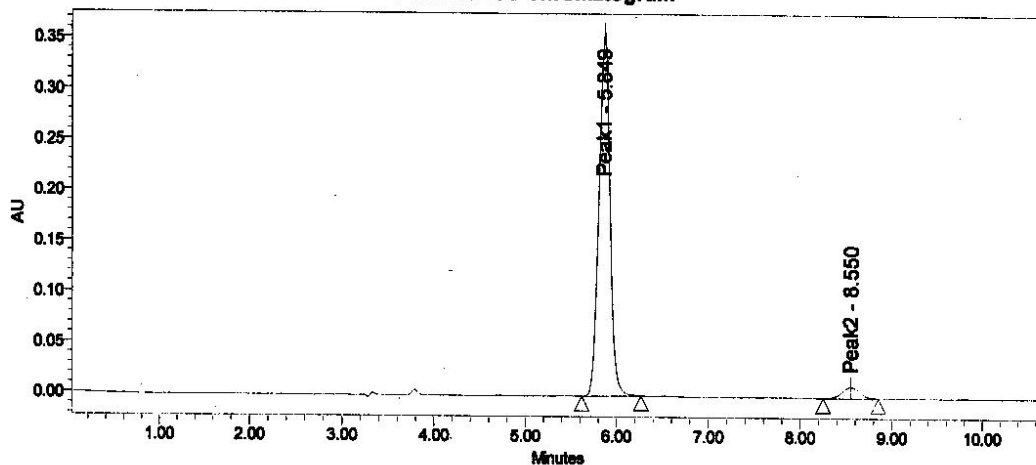

Peak Results

|   | RT    | Area    | % Area | Height | Amount | Units |
|---|-------|---------|--------|--------|--------|-------|
| 1 | 5.849 | 3014220 | 95.25  | 358139 |        |       |
| 2 | 8.550 | 150408  | 4.75   | 11367  |        |       |

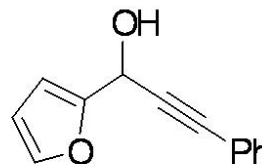

Reported by User: System  
 Report Method: szx  
 Report Method ID 4116  
 Page: 1 of 2

Project Name: szx  
 Date Printed:  
 2007-7-13  
 14:33:28 PRC

## SAMPLE INFORMATION

|                   |                        |                     |              |
|-------------------|------------------------|---------------------|--------------|
| Sample Name:      | xz-2                   | Acquired By:        | System       |
| Sample Type:      | Unknown                | Sample Set Name:    |              |
| Vial:             | 605                    | Acq. Method Set:    | szx          |
| Injection #:      | 5                      | Processing Method:  | szx          |
| Injection Volume: | 20.00 ul               | Channel Name:       | 254.0nm      |
| Run Time:         | 30.0 Minutes           | Proc. Chnl. Descr.: | PDA 254.0 nm |
| Date Acquired:    | 2007-9-13 10:56:26 CST |                     |              |
| Date Processed:   | 2007-9-13 11:10:05 CST |                     |              |

Auto-Scaled Chromatogram

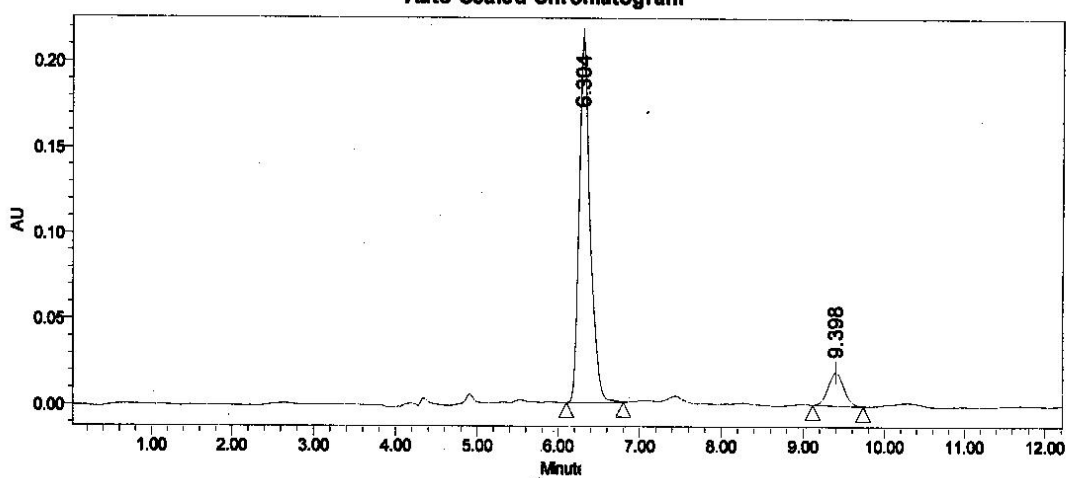

Peak Results

|   | RT    | Area    | % Area | Height | Amount | Units |
|---|-------|---------|--------|--------|--------|-------|
| 1 | 6.304 | 2003050 | 88.58  | 213202 |        |       |
| 2 | 9.398 | 258870  | 11.44  | 19403  |        |       |

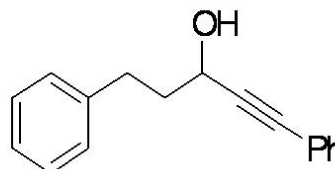

Reported by User: System  
 Report Method: szx  
 Report Method ID 4116  
 Page: 1 of 2

Project Name: szx  
 Date Printed:  
 2007-9-13  
 11:10:21 PRC

The full data for Table 1: The relationship between ee values and the ratio of  $\text{Ti}(\text{O}^i\text{Pr})_4/\text{ligand}$  when different solvents were used.

| Entry | Solvent                  | $\text{Ti}(\text{O}^i\text{Pr})_4/2\mathbf{a}$ | e.e |
|-------|--------------------------|------------------------------------------------|-----|
| 1     | toluene                  | 0.125/1                                        | 0   |
| 2     | toluene                  | 0.25/1                                         | 6   |
| 3     | toluene                  | 1/1                                            | 71  |
| 4     | toluene                  | 2/1                                            | 70  |
| 5     | toluene                  | 3/1                                            | 43  |
| 6     | toluene                  | 4/1                                            | 29  |
| 7     | toluene                  | 5/1                                            | 17  |
| 8     | toluene                  | 6/1                                            | 2   |
| 9     | $\text{CH}_2\text{Cl}_2$ | 0.5/1                                          | -3  |
| 10    | $\text{CH}_2\text{Cl}_2$ | 1/1                                            | 79  |
| 11    | $\text{CH}_2\text{Cl}_2$ | 2/1                                            | 71  |
| 12    | $\text{CH}_2\text{Cl}_2$ | 3/1                                            | 57  |
| 13    | THF                      | 0/1                                            | -20 |
| 14    | THF                      | 0.5/1                                          | 82  |
| 15    | THF                      | 2/1                                            | 85  |
| 16    | THF                      | 3/1                                            | 75  |
| 17    | THF                      | 4/1                                            | 81  |
| 18    | THF                      | 5/1                                            | 80  |
| 19    | THF                      | 6/1                                            | 80  |
| 20    | THF                      | 7/1                                            | 79  |
